# Multiple classes and isoforms of the RNA polymerase recycling motor protein Held

Joachim S. Larsen<sup>1</sup> (ORCID: 0000-0001-7270-8081), Michael Miller<sup>1</sup> (ORCID: 0000-0001-7990-3381), Aaron J. Oakley<sup>2</sup> (ORCID: 0000-0002-4764-014X), Nicholas E. Dixon<sup>2</sup> (0000-0002-5958-6945) and Peter J. Lewis<sup>1,2\*</sup> (ORCID: 0000-0002-1992-062X)

<sup>1</sup>School of Environmental and Life Sciences, University of Newcastle, Callaghan, NSW 2308, Australia

<sup>2</sup>School of Chemistry and Molecular Bioscience, University of Wollongong and Illawarra Health and Medical Research Institute, Wollongong, NSW 2522, Australia

\* To whom correspondence should be addressed. Tel: +612 4921 5701; Email: Peter.Lewis@newcastle.edu.au, lewisp@uow.edu.au

**KEY WORDS: RNA polymerase, gene expression regulation, helicases, phylogenetic analysis**

## **SUMMARY**

Efficient control of transcription is essential in all organisms. In bacteria, where DNA replication and transcription occur simultaneously, the replication machinery is at risk of colliding with highly abundant transcription complexes. This can be exacerbated by the fact that transcription complexes pause frequently. When pauses are long-lasting, the stalled complexes must be removed to prevent collisions with either another transcription complex or the replication machinery. Held is a protein that represents a new class of ATP-dependent motor protein distantly related to helicases. It was first identified in the model Gram-positive bacterium *Bacillus subtilis* and is involved in removing and recycling stalled transcription complexes. To date, two classes of Held have been identified: one in the low G+C and the other in the high G+C Gram-positive bacteria. In this work we have undertaken the first comprehensive investigation of the phylogenetic diversity of Held proteins. We show that genes in certain bacterial classes have been inherited by horizontal gene transfer, many organisms contain multiple expressed isoforms of Held, some of which are associated with antibiotic resistance, and that there is a third class of Held protein found in Gram-negative bacteria. Therefore, Held proteins represent an important new class of transcription factor associated with genome maintenance and antibiotic resistance that are conserved across the Eubacterial kingdom.

35

## 36 INTRODUCTION

37 Transcription elongation is punctuated by pauses that serve important functions in permitting correct  
38 folding of structural RNA, efficient coupling of transcription and translation and ensuring efficient  
39 transcription termination at the correct site (Saba et al., 2019). Whilst most pausing events serve an  
40 important function, on occasion RNA polymerase (RNAP) is unable to restart transcription and must  
41 be removed from the DNA to prevent damaging collisions with the DNA replication machinery or  
42 other transcription complexes (Adelman and Lis, 2012, Gupta et al., 2013, Pomerantz and O'Donnell,  
43 2008, Pomerantz and O'Donnell, 2010, Rocha, 2004). Several systems used to resolve stalled  
44 transcription complexes have been characterised; for example, Mfd has been shown to bind to stalled  
45 transcription complexes (either a stochastic pause during transcription of structured RNA or at a site  
46 of DNA damage), physically removing it from the DNA or restarting it *via* a RecG-like ATPase motor  
47 domain (Ragheb et al., 2021, Ghodke et al., 2020, Ho et al., 2018, Shi et al., 2020, Westblade et al.,  
48 2010, Kang et al., 2021, Le et al., 2018). In *B. subtilis* RNaseJ1 clears stalled RNAP using a torpedo  
49 mechanism (5'-3' exonuclease activity followed by RNAP displacement) (Sikova et al., 2020), and in  
50 *Escherichia coli* the helicase protein RapA has been shown to be important in recycling RNAP (Liu et  
51 al., 2015). UvrD/PcrA in concert with Gre factors has been reported to act on RNAP stalled at a DNA  
52 lesion, binding to the complex and using the energy of ATP hydrolysis to backtrack away from the  
53 lesion to allow repair systems access to the damaged DNA (Epshtein et al., 2014, Hawkins et al.,  
54 2019), although it now appears that the role of these helicases is in preventing formation of, and  
55 resolving, R-loops (RNA-DNA hybrids) that can have a detrimental effect on DNA replication  
56 (Urrutia-Irazabal et al., 2021).

57

58 An additional system identified in Gram-positive bacteria required for recycling stalled transcription  
59 complexes involves the action of the motor protein HelD (Wiedermannova et al., 2014). The  
60 designation of HelD (also called helicase IV) was originally made for a protein identified in *E. coli* as  
61 a weakly processive 3'-5' DNA helicase (Wood and Matson, 1987). To avoid confusion with the  
62 separate classes of HelD proteins that are the focus of this work, the *E. coli* protein will be referred to  
63 as helicase IV. Based on conserved sequence motifs Helicase IV is a superfamily 1 (SF1) helicase,  
64 related to housekeeping helicase UvrD/PcrA (Figure 1). The *B. subtilis* gene *yvgS* was assigned the  
65 name *helD* based on limited protein sequence conservation to helicase IV (Wiedermannova et al.,  
66 2014), although the proteins differed with respect to domain organisation (Koval et al., 2019,  
67 Wiedermannova et al., 2014)(Figure 1). Little functional, and no structural information is available for  
68 helicase IV, although a model generated by AlphaFold2 (Jumper et al., 2021) enables tentative  
69 comparison of UvrD/PcrA, helicase IV and *B. subtilis* HelD (Figure 1). Helicase IV and HelD show

70 similarity with UvrD/PcrA around the well-defined 1A and 2A helicase domains (blue and orange,  
71 respectively, Figure 1A), but not in other structural motifs associated with helicase activity  
72 (UvrD/PcrA domains 1B and 2B). Both helicase IV and HelD have N-terminal domains not present in  
73 UvrD/PcrA helicases, and helicase IV has a putative 1B domain which may account for its reported  
74 helicase activity, whilst in the equivalent 1B domain position HelD contains unrelated sequence that  
75 folds into a novel clamp-arm (CA) structure important in transcription recycling (Newing et al., 2020,  
76 Wiedermannova et al., 2014). Whilst UvrD/PcrA and helicase IV have helicase activity, HelD shows  
77 none suggesting it has evolved from an SF1-type helicase into a transcription recycling factor that  
78 utilises the energy from ATP hydrolysis catalysed by its helicase motifs for its transcription-related  
79 activity.

80

81 Studies on HelD from low G+C (*Bacillus subtilis*) and high G+C (*Mycobacterium smegmatis*) Gram-  
82 positives revealed that there are two distinct classes of enzyme, confirmed by phylogenetic and  
83 structural analyses (Kouba et al., 2020, Newing et al., 2020, Pei et al., 2020). Class I HelD was  
84 described from *B. subtilis*, whilst the structurally distinct Class II enzyme was identified in *M.*  
85 *smegmatis* (Kouba et al., 2020, Newing et al., 2020, Pei et al., 2020). Class I and II HelDs have  
86 similar motor domains but differ in the structure of their arms and the mechanism by which these  
87 arms perform the mechanical activity of removing nucleic acids and recycling RNAP (Kouba et al.,  
88 2020, Newing et al., 2020, Pei et al., 2020).

89

90 The recent structures of HelD from *B. subtilis* and *M. smegmatis* bound to core RNAP ( $\alpha_2\beta\beta'\omega$ )  
91 (Kouba et al., 2020, Newing et al., 2020) are shown in Figure 2A and B, along with the Class I *B.*  
92 *subtilis* (Figure 2C) and Class II *M. smegmatis* (Figure 2D) enzymes. HelD has an unusual mode of  
93 action dependent on two arms (CA and SCA, Figure 2C and D) attached to the central UvrD-like  
94 ATPase motor domain (Head and Torso, Figure 2C and D), in which nucleic acids are pushed out of  
95 the active site whilst the DNA binding clamp and RNA exit channels are simultaneously opened,  
96 leading to the release of the stalled RNAP (Newing et al., 2020). This recycling activity is powered by  
97 ATP hydrolysis and the mechanical action of the two arms that flank the motor domain. In the Class I  
98 HelD, the long SCA (Figure 2A and C) is able to physically remove nucleic acids from the active site  
99 (dotted circle in Figure 2A), whereas in the Class II HelD the SCA is too short, and instead nucleic  
100 acid removal is performed by a CA insert called the PCh-loop (Figure 2B and D) (Kouba et al., 2020,  
101 Newing et al., 2020). Recent reports also suggest that some Class II HelDs (from *M. abscessus* and  
102 *Streptomyces venezuelae*) are able to confer rifampicin resistance through removal of rifampicin by  
103 the PCh-loop (Hurst-Hess et al., 2021, Surette et al., 2021).

104

105 In this work, we take advantage of the recent structural information to compile a detailed phylogenetic  
106 analysis of HelD showing that many organisms contain more than one (up to 5) different versions of  
107 HelD, that the genes encoding these enzymes are all expressed, that HelD is likely to have been  
108 acquired by horizontal gene transfer in Gram-negative *Bacteroides* and Gram-positive *Coriobacteria*  
109 and *Acidimicrobiia*, and that there is a third Class of HelD found in the Gram-negative  
110 *Deltaproteobacteria*.

111

## 112 **RESULTS AND DISCUSSION**

### 113 **Distribution and phylogeny of HelD**

114 Searching for HelD-like sequences using the conserved domain architecture retrieval tool (CDART;  
115 NCBI) portal identified >13,000 hits. Additional searches using NCBI BLASTP suggest that there are  
116 substantially more sequences in the database, but many of these are from incomplete genomes and/or  
117 metagenomic sequencing projects, making systematic identification and classification of sequences  
118 unfeasible, particularly in cases where an organism carries more than one *helD* gene (see below).  
119 Nevertheless, it is clear that HelD is widely distributed in the eubacteria, especially in the *Firmicutes*  
120 and *Actinobacteria* phyla of the Gram-positive eubacterial domain. To date, we have not detected  
121 HelD-like sequences in *Archaea* or *Eucarya*. Previously, Newing et al. (Newing et al., 2020) showed  
122 that HelD sequences fall into two classes, which was confirmed at the structural and functional level  
123 in comparing HelD proteins from the *Firmicutes* and *Actinobacteria* (Kouba et al., 2020, Newing et  
124 al., 2020, Pei et al., 2020). Using a wider range of carefully curated sequences from complete  
125 genomes identified from the initial CDART search, an unrooted phylogenetic tree was constructed to  
126 enable a more detailed understanding of HelD distribution and phylogeny which was compared  
127 against the RNAP RpoB ( $\beta$ ) subunit (Figure 3).

128

129 Four features are clear from this tree (Figure 3A): 1. HelD is also present in Gram-negative bacteria;  
130 2. A third class of HelD is present in the *Deltaproteobacteria*; 3. In some organisms HelD has been  
131 ancestrally acquired by horizontal gene transfer; 4. Many organisms contain more than one *helD* gene,  
132 with the *Firmicutes*, *Clostridia*, *Acidimicrobiia*, and *Deltaproteobacteria* having up to three, and the  
133 *Actinobacteria* up to five.

134

135 Overall, the tree contains three major branches: Class I *HelD* sequences originating mainly from the  
136 low G+C Gram-positives and *Bacteroidia*, Class II *HelD* sequences from the high G+C Gram-  
137 positives, and a novel Class III identified in *Deltaproteobacteria*. Interestingly, the *HelD* sequences  
138 from the Actinobacterial *Coriobacteria* class, typified by *Olsenella uli* that is associated with  
139 gingivitis, are all located to the Class I branch of the tree (numbers 16–20; Figure 3). Branch  
140 divergence and clustering of sequences to regions of the tree comprising *Lactobacilli* (numbers 14,  
141 15, 21–24; Figure 3) and *Clostridia* (numbers 25–29; Figure 3) indicate that an ancestral  
142 *Coriobacteria* likely acquired *helD* genes by horizontal gene transfer from these organisms (Figure  
143 S1). That *Coriobacteria* are isolated from the gingival crevice, gastrointestinal and genital tracts  
144 (Clavel, 2014) is consistent with this proposition. The length of the branches suggests this horizontal  
145 transfer event occurred long ago but after the evolution of the mammalian hosts that provide  
146 environments with co-localised *Lactobacilli*, and that *helD* genes have been stably inherited and co-  
147 evolved within the *Coriobacteria*. In addition to the *helD* gene from *Adlercreutzia equolifaciens* DSM  
148 19450 (AEQU\_1689, number 20.1; Figure 3) that clusters with those of the other *Coriobacteria*, *A.*  
149 *equolifaciens* contains a second *helD* gene (AEQU\_0484, number 20.2; Figure 3) that clusters with  
150 *Clostridia*, suggesting it may have been acquired through a separate horizontal gene transfer event  
151 rather than through duplication and evolution of a gene inherited by a single acquisition event (Figure  
152 S1). The fact that *Lactobacilli*, *Clostridia*, and *Adlercreutzia* all inhabit the gastrointestinal tract make  
153 this a reasonable hypothesis. There is also some evidence that Class II *HelD* sequences have been  
154 acquired by horizontal gene transfer from the *Actinobacteria* to the *Acidimicrobiia* (numbers 48, 52.1  
155 and 52.2; Figures 3 and S2). The *Acidimicrobiia* are a recently described class, exemplified by  
156 *Acidobacterium ferrooxidans* (number 48; Figure 3) that have been isolated from diverse, but  
157 generally acidic and hostile environments, and tend to grow slowly which may account for the paucity  
158 of information and diversity of species currently available. At least one species of the *Acidimicrobiia*,  
159 *Ilumatobacter coccineus* (number 52, Figure 3) contains multiple copies of *helD*.

160

161 Comparison of the phylogenetic tree of the RNA polymerase  $\beta$  subunit RpoB with the *HelD* tree  
162 supports this assumption that *helD* genes in the *Coriobacteria* and *Acidimicrobiia* have been acquired  
163 by horizontal gene transfer from *Firmicutes/Clostridia/Actinobacteria* that share the same ecological  
164 niches (Figures 3A and B). Acquisition of *helD* genes by horizontal gene transfer in the *Bacteroidia* is  
165 described below.

166

167 **Acquisition of *helD* in Gram-negative *Bacteroides***

168 HelD sequences were also identified in the phylum of Gram-negative bacteria, *Bacteroides*.  
169 Phylogenetically, these clustered close to HelD sequences from *Clostridioides difficile* (Figures 3A  
170 and S3; sequences 27–29 *C. difficile*, 30–35 *Bacteroides*). Extended analysis indicated that HelD  
171 sequences from *Bacteroides* and *Parabacteroides* (family *Porphyromonadaceae*) clustered closest to  
172 those from *Firmicutes* that are strict gut anaerobes from the order *Clostridiales* (Figure S4). These  
173 bacteria were from cluster IV (*Ruminococaceae*) and XIVa (*Lachnospiraceae*) that are abundant gut  
174 microbes associated with many aspects of good health, and the cluster XI gut pathogen *C. difficile*  
175 (Lopetuso et al., 2013, Lozupone et al., 2012, Milani et al., 2017). Since the *Bacteroides* and  
176 *Parabacteroides* are also abundant obligate gut anaerobes, this clustering suggested that *helD* was  
177 horizontally transferred from an anaerobic gut *Firmicute*, most likely from the order *Clostridiales*  
178 (Figure S3). Analysis of the genome context of *helD* genes indicated they were not (or are no longer)  
179 located in mobile genetic elements, with the exception of *B. thetaiaotamicron*, and along with their  
180 widespread distribution in *Bacteroides/Parabacteroides* suggests *helD* genes have been retained over  
181 a significant time period, indicating they serve a useful cellular function. The fact that HelD  
182 sequences identified in *Bacteroides* cluster with Class I sequences from the low G+C Gram-positive  
183 bacteria rather than forming a separate Class, as seen with HelD from the *Deltaproteobacteria* (see  
184 below), further supports the idea that this group acquired *helD* genes by horizontal gene transfer due  
185 to sharing a similar environmental niche to anaerobic gut *Clostridiales*.

186

### 187 **A novel HelD class in Gram-negative bacteria**

188 The analysis presented in this work also shows that there is a third class of HelD proteins encoded by  
189 the *Deltaproteobacteria* (Class III, Figure 3 and 4; see below). Newing *et al.* (Newing et al., 2020)  
190 identified Class I and II HelD proteins based on the conservation of twelve sequence motifs. These  
191 motifs (labelled I–XII, Figure S5) are all conserved in Class III proteins (exemplified by *Myxococcus*  
192 *xanthus* HelD), despite the low overall levels of sequence similarity found in HelD proteins (Newing  
193 et al., 2020). A model of *M. xanthus* HelD was also generated from an unbiased screen of the protein  
194 structure database (Figure 4; see Materials and Methods). As seen with Class I and II proteins, there is  
195 a HelD-specific N-terminal domain of ~50–150 amino acids that has a long antiparallel  $\alpha$ -helical  
196 structure (secondary channel arm, SCA, Figure 4B) that is required to anchor HelD in the secondary  
197 channel of its cognate RNAP (Kouba et al., 2020, Newing et al., 2020, Pei et al., 2020), and the 1A  
198 helicase domain is split by the insertion of an arm-like structure (clamp arm, CA, Figures 4B and S5)  
199 that is used to bind within the primary channel of RNAP, forcing it open to aid the release of bound  
200 nucleic acids (Kouba et al., 2020, Newing et al., 2020, Pei et al., 2020).

201

202 An absolutely conserved DWR (Asp-Trp-Arg) sequence motif was identified in the unique N-terminal  
203 domain of all HelD sequences, and determination of the structures of HelD showed that the conserved  
204 Trp residue resides within a hydrophobic pocket called the Trp-cage, important in stabilising the  
205 interaction between the N-terminal domain wedged deep into the secondary channel of RNAP and the  
206 helicase 1A domain (Newing et al., 2020). In most HelD sequences identified to date, the DWR motif  
207 is extended to DWR[A/S]P, but in *Deltaproteobacterial* HelDs there is an additional amino acid  
208 inserted in this motif following the R residue, i.e., DWRX[A/S]P, which is a key defining feature of a  
209 Class III HelD (Figure S5). This additional amino acid does not appear to be highly conserved, the  
210 motif being DWRFAP in *M. xanthus*, DWRNAP in *Haliangum ocraceum*, and DWRHAP in  
211 *Sorangium cellulosum*, with H or N appearing to be most common. Modelling suggests this amino  
212 acid is located on a loop with its side chain in an additional pocket that may be important in  
213 reinforcing the connection between the SCA and torso, potentially through burying the conserved Trp  
214 deeper inside the Trp-cage in comparison with Class I and II HelDs (boxed green residues, Figure  
215 4B). Structural modelling also shows the SCA of *M. xanthus* HelD (HelD<sub>MX</sub>) is longer than that of *M.*  
216 *smegmatis* (HelD<sub>MS</sub>), but shorter than the *B. subtilis* protein (HelD<sub>BS</sub>). The tip of the SCA of HelD<sub>MX</sub>  
217 does not reach the active site (catalytic Mg<sup>2+</sup>, green sphere; compare dashed circles in Figure 5C-F)  
218 but would clash with the bridge helix in RNAP (teal, Figure 5D and F), potentially causing it to distort  
219 and displace the template DNA strand as seen with HelD<sub>BS</sub> (Newing et al., 2020). The RNAP trigger  
220 loop contains a large insertion in the *Deltaproteobacteria* ( $\beta$ 'In6, Figure 5B) similar to that seen in  
221 *Gammaproteobacteria*, and it was assumed this (and the  $\beta$ In4 insertion, Figure 5B) would sterically  
222 interfere with HelD binding to RNAP in Gram-negative bacteria. Although the trigger loop in the  
223 modelled *M. xanthus* RNAP–HelD complex does clash with HelD<sub>MX</sub> (Figure 5E and F), this is not  
224 extensive and given the inherent flexibility in this domain, small conformational changes would  
225 readily enable binding as seen in Gram-positive bacteria (Kouba et al., 2020, Newing et al., 2020, Pei  
226 et al., 2020). The CA of HelD<sub>MX</sub> is similar in size to that of HelD<sub>MS</sub> (although it does not contain a  
227 PCh domain; Figure 5B). The CA domain is required for clamp opening and DNA release in the  
228 Gram-positive systems, and likely will serve a similar function in Class III HelDs.

229

230 Examination of sequences retrieved from the CDART search indicated *helD* genes may be even more  
231 widely distributed in the *Proteobacteria* (including the *Gammaproteobacteria*), although this could  
232 not be verified by searches of complete genomes in databases such as KEGG and may represent mis-  
233 classification from metagenomic sequencing projects. For example, BLASTP searches suggest hits  
234 reported as being from *E. coli* and *Vibrio vulnificus* identified from metagenomic data are in fact from  
235 *Bacteroides* and *Bacillus*, respectively ((Poyet et al., 2019), and NCBI SRA accession code:  
236 PRJNA523266). Nevertheless, it is possible that *helD* genes are more widely distributed in  
237 *Proteobacteria*.

238

### 239 **RNAP $\delta$ subunit and HelD**

240 The *Firmicutes* have the smallest multi-subunit RNAPs currently known (Lane and Darst, 2010b,  
241 Lane and Darst, 2010a), as well as auxiliary subunits  $\delta$  and  $\epsilon$  that are not found in other bacteria  
242 (Keller et al., 2014, Weiss and Shaw, 2015). In the original work characterising the function of HelD  
243 as a transcription complex recycling factor, it was shown that although  $\delta$  or HelD on their own  
244 enhanced recycling, there was a synergistic relationship between them in *B. subtilis* transcription  
245 recycling assays (Wiedermannova et al., 2014). Structural analysis of RNAP recycling complexes  
246 shows that  $\delta$  and HelD interact, as well as providing clues as to how  $\delta$  could enhance the recycling  
247 activity of HelD by augmenting clamp opening (Pei et al., 2020). These structural studies also  
248 provided insights into how  $\delta$  could facilitate transcription recycling in the absence of HelD (Miller et  
249 al., 2021). Genome searches indicated that not all *Firmicutes* contained both *helD* and *rpoE* (encoding  
250 the  $\delta$  subunit) genes, and an analysis was performed based on the *rpoB* gene to establish whether there  
251 is segregation of genes amongst orders and/or based on natural environment (Figure 6).

252

253 In the bulk of cases, the *Bacilli*, *Lactobacilli*, *Leuconostoc* and *Enterococci* contained genes for both  
254 HelD and  $\delta$ , and if the gene for one protein was missing, the other was present (Figure 6). The  
255 *Staphylococci* were heterogeneous with species such as *S. rostri* containing both *helD* and *rpoE*  
256 genes, whereas *S. aureus* only contained the gene for the  $\delta$  subunit. There is a segregation of species  
257 containing both *helD* and *rpoE* cf. *rpoE* only, with *rpoE* only present in the *S. saprophyticus* and *S.*  
258 *aureus* clusters (Takahashi et al., 1999). Species that fall within the *S. hyicus-intermedius* cluster (e.g.,  
259 *S. rostri*) contained both *helD* and *rpoE*, but there were exceptions such as *S. felis*, which only  
260 contained *rpoE* (Figure 6). The *Streptococci* (order *Lactobacillales*) only contained the *rpoE* gene  
261 (Figure 6), whereas the *Clostridia*, except for *C. (Erysipelatoclostridium) cocleatum* and *inocuum*,  
262 only contained *helD* genes (Figure 6). Thus, it appears that in the *Firmicutes*, especially class  
263 *Bacillus*, the default situation is for both *rpoE* and *helD* to be present, but the absence of one gene is  
264 compensated for by the presence of the other.

265

### 266 **Many bacteria contain multiple *helD* genes**

267 A striking observation made in the preliminary phylogenetic analysis of HelD was that some  
268 organisms contain more than one *helD* gene (Newing et al., 2020). This preliminary analysis has now  
269 been extended and it is clear that the presence of  $>1$  *helD* is common and is found in both Gram-  
270 positive and -negative organisms (Figure 3A). Using complete genome sequences, up to 5 genes



271 encoding HelD have been identified (e.g. *Nonomuraea* sp. ATCC55076 [organism 55]; Figures 3A  
272 and S6), and organisms have been identified with 1, 2, 3, 4, or 5 *helD* genes. Although most contain a  
273 single *helD* gene, low G+C Gram-positives and Gram-negatives were not found with >3, and high  
274 G+C Gram-positive *Actinobacteria* such as *Streptomyces*, *Nonomuraea*, and *Frankia* were identified  
275 with  $\geq 4$  *helD* genes. A simple assumption is that these multiple genes are the product of amplification  
276 through recombination, and this may well be the root of their original source, but phylogenetic  
277 analysis indicates each gene is unique, and organisms with more than one *helD* gene tend to encode  
278 both large (~740-850 aa) and small (~680-720 aa) variants. The variation in sequence length is due to  
279 differences in the flanking SCA and CA domains (arms) with the core 1A and 2A helicase domains all  
280 being of similar size. This suggests the motor function of these proteins is conserved, but the function  
281 of large vs small HelD variants may differ depending on the size of the SCA and CA arms. The  
282 multiple *helD* genes also segregate to Class I, -II, or -III according to the organism in which they are  
283 found; Class I sequences are found in *Firmicutes*, whereas *Actinobacteria* all have Class II sequences  
284 (with the exception of the Coriobacterium *Adlercreutzia equolifaciens*, above), and Class III  
285 sequences are found in *Deltaproteobacteria*. Of the *Bacteroides/Parabacteroides* analysed to date, all  
286 encode only a single Class I *helD* gene.

287

288 It was possible that some/all of the additional *helD* sequences represented cryptic genes that are not  
289 expressed under any conditions, or that they are differentially expressed during different growth  
290 phases or conditions, which might provide clues to potential functions. Transcriptomics data were  
291 retrieved from the Sequence Read Archive (SRA) for selected organisms containing 1 or >1 *helD*  
292 representative of all three classes of HelD, and expression levels compared relative to *rpoB* (RNAP  $\beta$   
293 subunit) and another housekeeping gene (SF1 helicase *pcrA/uvrD*). In all cases, all of the *helD* genes  
294 were expressed, often at an approximately similar level to *pcrA/uvrD* (Figure 7). The RNA-seq data of  
295 *B. subtilis* *helD* and *pcrA* obtained from experiments by Revilla-Guarinos et al. (Revilla-Guarinos et  
296 al., 2020) to examine changes in gene expression in a model soil organism on exposure to the anti-  
297 fungal agent amphotericin B produced by *Streptomyces* closely matched that of the oligonucleotide  
298 hybridisation transcriptomics data of Nicolas et al. (Nicolas et al., 2012) and showed the level of *helD*  
299 expression was not influenced by amphotericin B and was ~3% that of *rpoB* (Figure 7A). This is also  
300 consistent with proteomics analysis indicating HelD is present at ~6% the level of RNAP (Delumeau  
301 et al., 2011). *B. cereus* contains two *helD* genes and the data set from strain F837/76 (Jessberger et al.,  
302 2019) grown in the presence and absence of mucin that can influence toxin production shows that  
303 both copies (one large, one small variant) are expressed, albeit at low levels, and expression is not  
304 significantly affected on exposure to mucin (Figure 7B). *C. perfringens* also contains two Class I *helD*  
305 genes, labelled CPE\_0599 (small; 706 aa) and CPE\_1619 (large; 763 aa) in strain 13, and expression  
306 levels were determined from datasets of cells grown in brain heart infusion (BHI) and a rich medium

307 developed for the optimal growth of fastidious anaerobes, fastidious anaerobe broth + 2% glucose  
308 (FABG) medium (Soncini et al., 2020). Both genes were expressed at levels comparable to *helD* in *B.*  
309 *subtilis*, and their cognate *prcA/uvrD*, although CPE\_0599 expression increased ~3-fold and  
310 CPE\_1619 expression decreased in FABG medium compared to BHI medium (Figure 6C).

311

312 *S. coelicolor* A2(3) contains four Class II *helD* genes, two encoding large (SCO\_2952 744 aa, and  
313 SCO\_5439 755 aa) and two encoding small (SCO\_4195 680 aa, and SCO\_4316 681 aa) variants. Data  
314 from a study on growth phase-dependent changes in gene expression (Jeong et al., 2016) were  
315 obtained from the SRA for analysis of *helD* expression and compared with *rpoB* and *prcA*. All four  
316 *helD* genes were expressed with relative levels changing ~2-fold dependent on the growth phase  
317 (Figure 7D). Expression levels were generally highest during mid-log and transition, and lowest  
318 during late and stationary phases, with modest changes between the ratios of expression of the  
319 different gene copies at all stages. The RNA-seq data set for *M. smegmatis* comparing changes in  
320 gene expression on deletion of the transcript cleavage factor GreA that is important in rescuing back-  
321 tracked RNAP (Feng et al., 2020) showed that expression of the single *helD* gene was substantially  
322 higher than in most other organisms, at about 25% the level of *rpoB* suggesting HelD may be  
323 particularly abundant in the *Mycobacteria* (Figure 7E). The expression levels of *helD* were similar in  
324 the presence and absence of *greA* indicating each factor acts on stalled transcription complexes  
325 independently of each other.

326

327 Analysis of RNA-seq data showed *helD* genes were also expressed in Gram-negative *M. xanthus* and  
328 *B. vulgatus* (Figure 7F and G), showing that despite the structural differences adjacent to the HelD  
329 interaction sites in the  $\beta$  and  $\beta'$  subunits of RNAP from these organisms, HelDs are expressed and  
330 likely able to bind and functionally interact with their cognate RNAPs. The data for *M. xanthus* were  
331 obtained to examine changes in gene expression during the development of fruiting bodies and spores.  
332 It is interesting to note that expression of *helD* in *M. xanthus* increases during development of spores  
333 (not to be confused with sporulation in the *Firmicutes*) and may point to a role in storage of inactive  
334 RNAP during dormancy as has been proposed for *B. subtilis* HelD (Pei et al., 2020). The study in *B.*  
335 *vulgatus* was designed to investigate the effect on gene expression of exogenous thiamine that may be  
336 important in niche establishment in the gut. Therefore, in most/all organisms that contain *helD*  
337 gene(s), it/they are expressed. The reason why one organism contains a single gene and closely related  
338 species contain more than one (e.g. *B. subtilis* and *B. cereus*, Figure 6A and B) is currently not clear,  
339 but the expression data would suggest that each isoform has a functional role to play in the cell, and  
340 there is not a significant difference in the expression of large vs small *helD* variants.

341  
342  
343  
344  
345  
346  
347  
348  
349  
350  
351  
352  
353  
354  
355  
356  
357  
358  
359  
360  
361  
362  
363  
364  
365  
366  
367  
368  
369  
370  
371  
372  
373  
374

## CONCLUSIONS

In this work we have examined the phylogenetic distribution and classification of the transcription recycling factor HelD in detail and have identified a new class restricted to the *Deltaproteobacteria*. In addition, it appears *helD* genes have been acquired by horizontal transfer on at least three occasions; *Bacteroides* have acquired *helD* from the *Clostridiales*, whereas the *Coriobacteria* have acquired it from the *Lactobacilli* and *Clostridiales*. The gut microbiome is known as an environment conducive to horizontal gene transfer, especially with respect to distribution of antibiotic resistance genes (McInnes et al., 2020), and given that *Bacteroides*, *Lactobacilli*, *Clostridiales*, and *Coriobacteria* are all common in the gut microbiome, it appears *A. equolifaciens* has acquired *helD* genes from gut microorganisms on two separate occasions. Indeed, an unusual feature of *helD* genes is that many organisms contain multiple paralogues, and that all versions are expressed. Why some organisms have a single gene for *helD* while a closely related species has multiple expressed copies is unclear, and this will make a fascinating avenue for future research. It is interesting to note that actinobacteria, such as *Streptomyces*, *Frankia*, and *Nonomuraea* (numbers 50, 51, 54 and 55; Figure 1) that are known producers of valuable bioactive compounds used as antibiotics and anti-cancer drugs contained the largest number of *helD* genes (4-5). It is possible that the 5 *helD* genes in *Nonomuraea* (number 55, Figure 1), that is a known producer of DNA-intercalating agents (Sungthong and Nakaew, 2015) are involved in genome maintenance through recycling stalled transcription complexes during production of these compounds. *Nonomuraea* and other *Actinomycetales* sometimes have a second *rpoB* gene that confers resistance of RNAP to compounds such as rifampicin and sorangicin that is induced by stress and is associated with production of secondary metabolites (D'Argenio et al., 2016). The combination of multiple HelD isoforms with drug resistant RNAP may be important in this proposed genome maintenance activity. In some organisms, such as *M. abscessus* and *S. venezuelae* *helD* expression is induced in the presence of the antibiotic rifampicin, conferring resistance, and this is associated with the presence of a DNA sequence called the Rifampicin Associated Element (RAE) found upstream of the gene (Hurst-Hess et al., 2021, Surette et al., 2021). It is proposed that the tip of the PCh loop is able to physically remove rifampicin bound to the RNAP  $\beta$  subunit in a pocket close to the active site. In *S. venezuelae* (organism #50, Figure 3) that has five *helD* genes, only one (SVEN\_6029, #50.3) is induced in the presence of rifampicin and has an upstream RAE (Surette et al., 2021). It is interesting to note that despite encoding a rifampicin resistant RNAP  $\beta$  subunit, *Nonomuraea* also has an RAE located directly upstream of *helD* NOA\_42280 (#55.3; Figure S5).

375 Investigation of the distribution of *helD* genes with upstream RAEs revealed they were clustered to  
376 two sub-branches of the *Actinobacteria* (Figure S7) that may be considered the HelR grouping based  
377 on the nomenclature of these proteins by (Hurst-Hess et al., 2021, Surette et al., 2021). It should be  
378 noted that clearly identifiable RAEs could not be found upstream of all the genes in the HelR group,  
379 including for *Frankia alni*, *Nocardia brasiliensis* or *Mycolicibacterium phlei* (54.2, 56.2, and 64,  
380 respectively; Figure 3 and S2). Rifampicin has also been observed to induce *helD* expression in the  
381 low G+C Gram-positive *B. subtilis*, but this induction does not confer resistance to the drug (Hutter et  
382 al., 2004). Nevertheless, the ability of naturally produced antibiotics to induce expression of *helD*  
383 genes suggests HelD proteins have a potentially important role in preserving genome integrity and  
384 gene expression in the bacteria in which they are found.

385

386 An additional area of future research should include functional and structural studies of HelD from  
387 Gram-negative bacteria, as due to the location of lineage-specific inserts in the  $\beta$  and  $\beta'$  subunits of  
388 RNAP in Gram-negatives it was assumed HelD-like proteins would bind poorly or be sterically  
389 inhibited from binding. HelD proteins represent a new class of motor enzyme involved in  
390 transcription complex recycling that are widely distributed in bacteria that make an important  
391 contribution to our understanding of the multiple different mechanisms used to resolve potentially  
392 lethal stalled transcription complexes.

393

394 Finally, it is important that genome annotation databases are updated as *helD* genes are often  
395 classified as *pcrA*, *uvrD*, or helicase IV-ATPase. Correct annotation of *helD* genes will enable more  
396 detailed understanding of the distribution, evolution and function of this fascinating new category of  
397 transcription factor.

398

## 399 **EXPERIMENTAL PROCEDURES**

### 400 **Sequence retrieval and analysis**

401 The sequence of *B. subtilis* 168 HelD (UniProtKB ID: O32215) was used to search for homologues  
402 using the NCBI Conserved Domain Architecture Retrieval Tool (Geer et al., 2002), which identified  
403 13,781 sequences, which were trimmed to 11,821. To aid subsequent analyses, particularly for the  
404 study of multiple copies of *helD* genes, the original sequences were used to search complete reference  
405 genomes from the KEGG (<https://www.kegg.jp>) and JGI (<https://jgi.doe.gov>) databases. HelD and  
406 RpoB sequences retrieved from these complete genomes were used for subsequent phylogenetic  
407 studies.

408

### 409 **Construction of phylogenetic trees**

410 Selected sequences were aligned using MAFFT (Katoh et al., 2002, Katoh et al., 2019) with default  
411 settings. Sequence alignments were then trimmed using Gblocks (<https://ngphylogeny.fr>). The best  
412 fitting model (LG) was determined using ProtTest 3 (Darriba et al., 2011) and phylogenetic trees were  
413 constructed using MrBayes 3.2 (Huelsenbeck and Ronquist, 2001, Ronquist et al., 2012), which were  
414 run until the standard deviation was below 0.01. Trees were visualised using iTol (Letunic and Bork,  
415 2019).

416

### 417 **Transcriptome data and analysis**

418 Gene expression data were obtained from datasets deposited in the Sequence Read Archive (SRA;  
419 <https://www.ncbi.nlm.nih.gov/sra>) and were: *B. subtilis* 168 (Revilla-Guarinos et al., 2020); *B. cereus*  
420 F837/76 (Jessberger et al., 2019); *Clostridium perfringens* 13 (Soncini et al., 2020); *Streptomyces*  
421 *coelicolor* A3(2) (Jeong et al., 2016); *Mycobacterium smegmatis* MC2-155 (Feng et al., 2020);  
422 *Myxococcus xanthus* DK1622 (SRA accession code: PRJNA516475); *Bacteroides vulgatus*  
423 ATCC8482 (SRA accession code: PRJNA473003). Reads were mapped to the respective reference  
424 genome sequences, and gene expression levels were calculated in Genious Prime 2020.2.3  
425 (<https://www.geneious.com>). Transcript per million (TPM) values were used for comparison of *helD*  
426 expression levels *cf.* *rpoB*, and *pcrA/uvrD* (for *S. coelicolor* A3(2)).

427

### 428 **Structure modelling**

429 RNAP RpoB ( $\beta$ ) and RpoC ( $\beta'$ ) subunits from *M. xanthus* DK1622 were modelled in SWISS-  
430 MODEL (Waterhouse et al., 2018) using *E. coli* RNAP, PDB ID: 6ALF (Kang et al., 2017) as a  
431 defined template. The *M. xanthus* *HelD* structure was modelled using i-Tasser (Yang et al., 2015)  
432 with output model 1 (C-score -0.48) selected for presentation in this work. Structural images used in  
433 this work were prepared in ChimeraX (Pettersen et al., 2020).

434

435

### 436 **ACKNOWLEDGEMENTS**

437 The authors appreciate the constructive comments from Brett Neilan, Leanne Pearson-Neilan, Caitlin  
438 Romanis and Karl Hassan during the preparation of this manuscript.

439

#### 440 **AUTHOR CONTRIBUTIONS**

441 JSL and MM, acquisition, analysis and interpretation of data. AJO, analysis and interpretation of data.  
442 NED, interpretation of data and writing of manuscript. PJJ, conception and design of study,  
443 acquisition, analysis and interpretation of data, writing of manuscript.

444

#### 445 **DATA AVAILABILITY**

446 The hybrid *M. xanthus* RNAP-HeLD complex model is available on request from P.J.L.

447

#### 448 **SUPPORTING INFORMATION**

449 Supporting information is available online.

450

#### 451 **FUNDING**

452 This work was supported by grants from the Australian Research Council (DP210100365 to P.J.L.,  
453 A.J.O, and N.E.D) and the Priority Research Centre for Drug Discovery, University of Newcastle  
454 (P.J.L). Funding for open access charge: Australian Research Council.

455

#### 456 **CONFLICT OF INTEREST**

457 The authors declare no conflict of interest.

458

#### 459 **REFERENCES**

- 460 ADELMAN, K. & LIS, J. T. 2012. Promoter-proximal pausing of RNA polymerase II: emerging roles  
461 in metazoans. *Nat Rev Genet*, 13, 720-31.
- 462 CLAVEL, T., LEPAGE, P., CHARRIER, C. 2014. The Family Coriobacteriaceae. *In*: ROSENBERG,  
463 E., DELONG, E.F., LORY S., STACKEBRANDT, E., THOMPSON, F. (ed.) *The*  
464 *Prokaryotes*. Berlin, Heidelberg: Springer.
- 465 D'ARGENIO, V., PETRILLO, M., PASANISI, D., PAGLIARULO, C., COLICCHIO, R., TALA, A.,  
466 DE BIASE, M. S., ZANFARDINO, M., SCOLAMIERO, E., PAGLIUCA, C., GABALLO,  
467 A., CICATIELLO, A. G., CANTIELLO, P., POSTIGLIONE, I., NASO, B., BOCCIA, A.,  
468 DURANTE, M., COZZUTO, L., SALVATORE, P., PAOLELLA, G., SALVATORE, F. &  
469 ALIFANO, P. 2016. The complete 12 Mb genome and transcriptome of *Nonomuraea*  
470 *gerenzanensis* with new insights into its duplicated "magic" RNA polymerase. *Sci Rep*, 6, 18.

- 471 DARRIBA, D., TABOADA, G. L., DOALLO, R. & POSADA, D. 2011. ProtTest 3: fast selection of  
472 best-fit models of protein evolution. *Bioinformatics*, 27, 1164-5.
- 473 DELUMEAU, O., LECOINTE, F., MUNTEL, J., GUILLOT, A., GUEDON, E., MONNET, V.,  
474 HECKER, M., BECHER, D., POLARD, P. & NOIROT, P. 2011. The dynamic protein  
475 partnership of RNA polymerase in *Bacillus subtilis*. *Proteomics*, 11, 2992-3001.
- 476 EPSHTEIN, V., KAMARTHAPU, V., MCGARY, K., SVETLOV, V., UEBERHEIDE, B.,  
477 PROSHKIN, S., MIRONOV, A. & NUDLER, E. 2014. UvrD facilitates DNA repair by  
478 pulling RNA polymerase backwards. *Nature*, 505, 372-7.
- 479 FENG, S., LIU, Y., LIANG, W., EL-SAYED AHMED, M. A. E., ZHAO, Z., SHEN, C., ROBERTS,  
480 A. P., LIANG, L., LIAO, L., ZHONG, Z., GUO, Z., YANG, Y., WEN, X., CHEN, H. &  
481 TIAN, G. B. 2020. Involvement of Transcription Elongation Factor GreA in *Mycobacterium*  
482 Viability, Antibiotic Susceptibility, and Intracellular Fitness. *Front Microbiol*, 11, 413.
- 483 GEER, L. Y., DOMRACHEV, M., LIPMAN, D. J. & BRYANT, S. H. 2002. CDART: protein  
484 homology by domain architecture. *Genome Res*, 12, 1619-23.
- 485 GHODKE, H., HO, H. N. & VAN OIJEN, A. M. 2020. Single-molecule live-cell imaging visualizes  
486 parallel pathways of prokaryotic nucleotide excision repair. *Nat Commun*, 11, 1477.
- 487 GUPTA, M. K., GUY, C. P., YEELES, J. T., ATKINSON, J., BELL, H., LLOYD, R. G., MARIANS,  
488 K. J. & MCGLYNN, P. 2013. Protein-DNA complexes are the primary sources of replication  
489 fork pausing in *Escherichia coli*. *Proc Natl Acad Sci U S A*, 110, 7252-7.
- 490 HAWKINS, M., DIMUDE, J. U., HOWARD, J. A. L., SMITH, A. J., DILLINGHAM, M. S.,  
491 SAVERY, N. J., RUDOLPH, C. J. & MCGLYNN, P. 2019. Direct removal of RNA  
492 polymerase barriers to replication by accessory replicative helicases. *Nucleic Acids Res*, 47,  
493 5100-5113.
- 494 HO, H. N., VAN OIJEN, A. M. & GHODKE, H. 2018. The transcription-repair coupling factor Mfd  
495 associates with RNA polymerase in the absence of exogenous damage. *Nat Commun*, 9, 1570.
- 496 HUELSENBECK, J. P. & RONQUIST, F. 2001. MRBAYES: Bayesian inference of phylogenetic  
497 trees. *Bioinformatics*, 17, 754-5.
- 498 HURST-HESS, K. R., SAXENA, A. & GHOSH, P. 2021. *Mycobacterium abscessus* HelR interacts  
499 with RNA Polymerase to confer intrinsic rifamycin resistance. *bioRxiv*, 2021.05.10.443476.
- 500 HUTTER, B., FISCHER, C., JACOBI, A., SCHAAB, C. & LOFERER, H. 2004. Panel of *Bacillus*  
501 *subtilis* reporter strains indicative of various modes of action. *Antimicrob Agents Chemother*,  
502 48, 2588-94.
- 503 JEONG, Y., KIM, J. N., KIM, M. W., BUCCA, G., CHO, S., YOON, Y. J., KIM, B. G., ROE, J. H.,  
504 KIM, S. C., SMITH, C. P. & CHO, B. K. 2016. The dynamic transcriptional and translational  
505 landscape of the model antibiotic producer *Streptomyces coelicolor* A3(2). *Nat Commun*, 7,  
506 11605.
- 507 JESSBERGER, N., DIETRICH, R., MOHR, A. K., DA RIOL, C. & MARTLBAUER, E. 2019.  
508 Porcine Gastric Mucin Triggers Toxin Production of Enteropathogenic *Bacillus cereus*. *Infect*  
509 *Immun*, 87.
- 510 JUMPER, J., EVANS, R., PRITZEL, A., GREEN, T., FIGURNOV, M., RONNEBERGER, O.,  
511 TUNYASUVUNAKOOL, K., BATES, R., ZIDEK, A., POTAPENKO, A., BRIDGLAND,  
512 A., MEYER, C., KOHL, S. A. A., BALLARD, A. J., COWIE, A., ROMERA-PAREDES, B.,  
513 NIKOLOV, S., JAIN, R., ADLER, J., BACK, T., PETERSEN, S., REIMAN, D., CLANCY,  
514 E., ZIELINSKI, M., STEINEGGER, M., PACHOLSKA, M., BERGHAMMER, T.,  
515 BODENSTEIN, S., SILVER, D., VINYALS, O., SENIOR, A. W., KAVUKCUOGLU, K.,  
516 KOHLI, P. & HASSABIS, D. 2021. Highly accurate protein structure prediction with  
517 AlphaFold. *Nature*.
- 518 KANG, J. Y., LLEWELLYN, E., CHEN, J., OLINARES, P. D. B., BREWER, J., CHAIT, B. T.,  
519 CAMPBELL, E. A. & DARST, S. A. 2021. Structural basis for transcription complex  
520 disruption by the Mfd translocase. *Elife*, 10.
- 521 KANG, J. Y., OLINARES, P. D., CHEN, J., CAMPBELL, E. A., MUSTAEV, A., CHAIT, B. T.,  
522 GOTTESMAN, M. E. & DARST, S. A. 2017. Structural basis of transcription arrest by  
523 coliphage HK022 Nun in an *Escherichia coli* RNA polymerase elongation complex. *Elife*, 6.
- 524 KATOH, K., MISAWA, K., KUMA, K. & MIYATA, T. 2002. MAFFT: a novel method for rapid  
525 multiple sequence alignment based on fast Fourier transform. *Nucleic Acids Res*, 30, 3059-66.

- 526 KATOH, K., ROZEWICKI, J. & YAMADA, K. D. 2019. MAFFT online service: multiple sequence  
527 alignment, interactive sequence choice and visualization. *Brief Bioinform*, 20, 1160-1166.
- 528 KELLER, A. N., YANG, X., WIEDERMANNNOVA, J., DELUMEAU, O., KRASNY, L. & LEWIS,  
529 P. J. 2014. epsilon, a new subunit of RNA polymerase found in gram-positive bacteria. *J*  
530 *Bacteriol*, 196, 3622-32.
- 531 KOUBA, T., KOVAL, T., SUDZINOVA, P., POSPISIL, J., BREZOVSKA, B., HNILICOVA, J.,  
532 SANDEROVA, H., JANOUSKOVA, M., SIKOVA, M., HALADA, P., SYKORA, M.,  
533 BARVIK, I., NOVACEK, J., TRUNDOVA, M., DUSKOVA, J., SKALOVA, T., CHON, U.,  
534 MURAKAMI, K. S., DOHNALEK, J. & KRASNY, L. 2020. Mycobacterial HelD is a  
535 nucleic acids-clearing factor for RNA polymerase. *Nat Commun*, 11, 6419.
- 536 KOVAL, T., SUDZINOVA, P., PERHACOVA, T., TRUNDOVA, M., SKALOVA, T.,  
537 FEJFAROVA, K., SANDEROVA, H., KRASNY, L., DUSKOVA, J. & DOHNALEK, J.  
538 2019. Domain structure of HelD, an interaction partner of Bacillus subtilis RNA polymerase.  
539 *FEBS Lett*, 593, 996-1005.
- 540 LANE, W. J. & DARST, S. A. 2010a. Molecular evolution of multisubunit RNA polymerases:  
541 sequence analysis. *J Mol Biol*, 395, 671-85.
- 542 LANE, W. J. & DARST, S. A. 2010b. Molecular evolution of multisubunit RNA polymerases:  
543 structural analysis. *J Mol Biol*, 395, 686-704.
- 544 LE, T. T., YANG, Y., TAN, C., SUHANOVSKY, M. M., FULBRIGHT, R. M., JR., INMAN, J. T.,  
545 LI, M., LEE, J., PERELMAN, S., ROBERTS, J. W., DEACONESCU, A. M. & WANG, M.  
546 D. 2018. Mfd Dynamically Regulates Transcription via a Release and Catch-Up Mechanism.  
547 *Cell*, 172, 344-357 e15.
- 548 LETUNIC, I. & BORK, P. 2019. Interactive Tree Of Life (iTOL) v4: recent updates and new  
549 developments. *Nucleic Acids Res*, 47, W256-W259.
- 550 LIU, B., ZUO, Y. & STEITZ, T. A. 2015. Structural basis for transcription reactivation by RapA.  
551 *Proc Natl Acad Sci U S A*, 112, 2006-10.
- 552 LOPETUSO, L. R., SCALDAFERRI, F., PETITO, V. & GASBARRINI, A. 2013. Commensal  
553 Clostridia: leading players in the maintenance of gut homeostasis. *Gut Pathog*, 5, 23.
- 554 LOZUPONE, C. A., STOMBAUGH, J. I., GORDON, J. I., JANSSON, J. K. & KNIGHT, R. 2012.  
555 Diversity, stability and resilience of the human gut microbiota. *Nature*, 489, 220-30.
- 556 MCINNES, R. S., MCCALLUM, G. E., LAMBERTE, L. E. & VAN SCHAIK, W. 2020. Horizontal  
557 transfer of antibiotic resistance genes in the human gut microbiome. *Curr Opin Microbiol*, 53,  
558 35-43.
- 559 MILANI, C., DURANTI, S., BOTTACINI, F., CASEY, E., TURRONI, F., MAHONY, J., BELZER,  
560 C., DELGADO PALACIO, S., ARBOLEYA MONTES, S., MANCABELLI, L., LUGLI, G.  
561 A., RODRIGUEZ, J. M., BODE, L., DE VOS, W., GUEIMONDE, M., MARGOLLES, A.,  
562 VAN SINDEREN, D. & VENTURA, M. 2017. The First Microbial Colonizers of the Human  
563 Gut: Composition, Activities, and Health Implications of the Infant Gut Microbiota.  
564 *Microbiol Mol Biol Rev*, 81.
- 565 MILLER, M., OAKLEY, A. J. & LEWIS, P. J. 2021. RNA polymerases from Low G+C Gram  
566 Positive Bacteria. *bioRxiv*, 2021.06.06.447298.
- 567 NEWING, T. P., OAKLEY, A. J., MILLER, M., DAWSON, C. J., BROWN, S. H. J., BOUWER, J.  
568 C., TOLUN, G. & LEWIS, P. J. 2020. Molecular basis for RNA polymerase-dependent  
569 transcription complex recycling by the helicase-like motor protein HelD. *Nat Commun*, 11,  
570 6420.
- 571 NICOLAS, P., MADER, U., DERYVYN, E., ROCHAT, T., LEDUC, A., PIGEONNEAU, N.,  
572 BIDNENKO, E., MARCHADIER, E., HOEBEKE, M., AYMERICH, S., BECHER, D.,  
573 BISICCHIA, P., BOTELLA, E., DELUMEAU, O., DOHERTY, G., DENHAM, E. L.,  
574 FOGG, M. J., FROMION, V., GOELZER, A., HANSEN, A., HARTIG, E., HARWOOD, C.  
575 R., HOMUTH, G., JARMER, H., JULES, M., KLIPP, E., LE CHAT, L., LECOINTE, F.,  
576 LEWIS, P., LIEBERMEISTER, W., MARCH, A., MARS, R. A., NANNAPANENI, P.,  
577 NOONE, D., POHL, S., RINN, B., RUGHEIMER, F., SAPP, P. K., SAMSON, F.,  
578 SCHAFFER, M., SCHWIKOWSKI, B., STEIL, L., STULKE, J., WIEGERT, T., DEVINE,  
579 K. M., WILKINSON, A. J., VAN DIJL, J. M., HECKER, M., VOLKER, U., BESSIERES, P.



- 580 & NOIROT, P. 2012. Condition-dependent transcriptome reveals high-level regulatory  
581 architecture in *Bacillus subtilis*. *Science*, 335, 1103-6.
- 582 PEI, H. H., HILAL, T., CHEN, Z. A., HUANG, Y. H., GAO, Y., SAID, N., LOLL, B.,  
583 RAPPSILBER, J., BELOGUROV, G. A., ARTSIMOVITCH, I. & WAHL, M. C. 2020. The  
584 delta subunit and NTPase HelD institute a two-pronged mechanism for RNA polymerase  
585 recycling. *Nat Commun*, 11, 6418.
- 586 PETERSEN, E. F., GODDARD, T. D., HUANG, C. C., MENG, E. C., COUCH, G. S., CROLL, T.  
587 I., MORRIS, J. H. & FERRIN, T. E. 2020. UCSF ChimeraX: Structure Visualization for  
588 Researchers, Educators, and Developers. *Protein Sci*.
- 589 POMERANTZ, R. T. & O'DONNELL, M. 2008. The replisome uses mRNA as a primer after  
590 colliding with RNA polymerase. *Nature*, 456, 762-6.
- 591 POMERANTZ, R. T. & O'DONNELL, M. 2010. Direct restart of a replication fork stalled by a head-  
592 on RNA polymerase. *Science*, 327, 590-2.
- 593 POYET, M., GROUSSIN, M., GIBBONS, S. M., AVILA-PACHECO, J., JIANG, X., KEARNEY, S.  
594 M., PERROTTA, A. R., BERDY, B., ZHAO, S., LIEBERMAN, T. D., SWANSON, P. K.,  
595 SMITH, M., ROESEMAN, S., ALEXANDER, J. E., RICH, S. A., LIVNY, J.,  
596 VLAMAKIS, H., CLISH, C., BULLOCK, K., DEIK, A., SCOTT, J., PIERCE, K. A.,  
597 XAVIER, R. J. & ALM, E. J. 2019. A library of human gut bacterial isolates paired with  
598 longitudinal multiomics data enables mechanistic microbiome research. *Nat Med*, 25, 1442-  
599 1452.
- 600 RAGHEB, M. N., MERRIKH, C., BROWNING, K. & MERRIKH, H. 2021. Mfd regulates RNA  
601 polymerase association with hard-to-transcribe regions in vivo, especially those with  
602 structured RNAs. *Proc Natl Acad Sci U S A*, 118.
- 603 REVILLA-GUARINOS, A., DURR, F., POPP, P. F., DORING, M. & MASCHER, T. 2020.  
604 Amphotericin B Specifically Induces the Two-Component System LnrJK: Development of a  
605 Novel Whole-Cell Biosensor for the Detection of Amphotericin-Like Polyenes. *Front*  
606 *Microbiol*, 11, 2022.
- 607 ROCHA, E. P. C. 2004. The replication-related organization of bacterial genomes. *Microbiology*, 150,  
608 1609-1627.
- 609 RONQUIST, F., TESLENKO, M., VAN DER MARK, P., AYRES, D. L., DARLING, A., HOHNA,  
610 S., LARGET, B., LIU, L., SUCHARD, M. A. & HUELSENBECK, J. P. 2012. MrBayes 3.2:  
611 efficient Bayesian phylogenetic inference and model choice across a large model space. *Syst*  
612 *Biol*, 61, 539-42.
- 613 SABA, J., CHUA, X. Y., MISHANINA, T. V., NAYAK, D., WINDGASSEN, T. A., MOONEY, R.  
614 A. & LANDICK, R. 2019. The elemental mechanism of transcriptional pausing. *Elife*, 8.
- 615 SHI, J., WEN, A., ZHAO, M., JIN, S., YOU, L., SHI, Y., DONG, S., HUA, X., ZHANG, Y. &  
616 FENG, Y. 2020. Structural basis of Mfd-dependent transcription termination. *Nucleic Acids*  
617 *Res*, 48, 11762-11772.
- 618 SIKOVA, M., WIEDERMANNNOVA, J., PREVOROVSKY, M., BARVIK, I., SUDZINOVA, P.,  
619 KOFRONOVA, O., BENADA, O., SANDEROVA, H., CONDON, C. & KRASNY, L. 2020.  
620 The torpedo effect in *Bacillus subtilis*: RNase J1 resolves stalled transcription complexes.  
621 *EMBO J*, 39, e102500.
- 622 SONCINI, S. R., HARTMAN, A. H., GALLAGHER, T. M., CAMPER, G. J., JENSEN, R. V. &  
623 MELVILLE, S. B. 2020. Changes in the expression of genes encoding type IV pili-associated  
624 proteins are seen when *Clostridium perfringens* is grown in liquid or on surfaces. *BMC*  
625 *Genomics*, 21, 45.
- 626 SUNGTHONG, R. & NAKAEW, N. 2015. The genus *Nonomuraea*: A review of a rare actinomycete  
627 taxon for novel metabolites. *J Basic Microbiol*, 55, 554-65.
- 628 SURETTE, M. D., WAGLECHNER, N., KOTEVA, K. & WRIGHT, G. D. 2021. HelR is a helicase-  
629 like protein that protects RNA polymerase from rifamycin antibiotics. *bioRxiv*,  
630 2021.05.10.443488.
- 631 TAKAHASHI, T., SATOH, I. & KIKUCHI, N. 1999. Phylogenetic relationships of 38 taxa of the  
632 genus *Staphylococcus* based on 16S rRNA gene sequence analysis. *Int J Syst Bacteriol*, 49 Pt  
633 2, 725-8.

- 634 URRUTIA-IRAZABAL, I., AULT, J. R., SOBOTT, F., SAVERY, N. J. & DILLINGHAM, M. S.  
635 2021. Analysis of the PcrA-RNA polymerase complex reveals a helicase interaction motif and  
636 a role for PcrA/UvrD helicase in the suppression of R-loops. *Elife*, 10.
- 637 WATERHOUSE, A., BERTONI, M., BIENERT, S., STUDER, G., TAURIELLO, G., GUMIENNY,  
638 R., HEER, F. T., DE BEER, T. A. P., REMPFER, C., BORDOLI, L., LEPORE, R. &  
639 SCHWEDE, T. 2018. SWISS-MODEL: homology modelling of protein structures and  
640 complexes. *Nucleic Acids Res*, 46, W296-W303.
- 641 WEISS, A. & SHAW, L. N. 2015. Small things considered: the small accessory subunits of RNA  
642 polymerase in Gram-positive bacteria. *FEMS Microbiol Rev*, 39, 541-54.
- 643 WESTBLADE, L. F., CAMPBELL, E. A., PUKHRAMBAM, C., PADOVAN, J. C., NICKELS, B.  
644 E., LAMOUR, V. & DARST, S. A. 2010. Structural basis for the bacterial transcription-repair  
645 coupling factor/RNA polymerase interaction. *Nucleic Acids Res*, 38, 8357-69.
- 646 WIEDERMANNNOVA, J., SUDZINOVA, P., KOVAL, T., RABATINOVA, A., SANDEROVA, H.,  
647 RAMANIUK, O., RITTICH, S., DOHNALEK, J., FU, Z., HALADA, P., LEWIS, P. &  
648 KRASNY, L. 2014. Characterization of Held, an interacting partner of RNA polymerase  
649 from *Bacillus subtilis*. *Nucleic Acids Res*, 42, 5151-63.
- 650 WOOD, E. R. & MATSON, S. W. 1987. Purification and characterization of a new DNA-dependent  
651 ATPase with helicase activity from *Escherichia coli*. *J Biol Chem*, 262, 15269-76.
- 652 YANG, J., YAN, R., ROY, A., XU, D., POISSON, J. & ZHANG, Y. 2015. The I-TASSER Suite:  
653 protein structure and function prediction. *Nat Methods*, 12, 7-8.
- 654

655

656 **FIGURES AND LEGENDS**

657

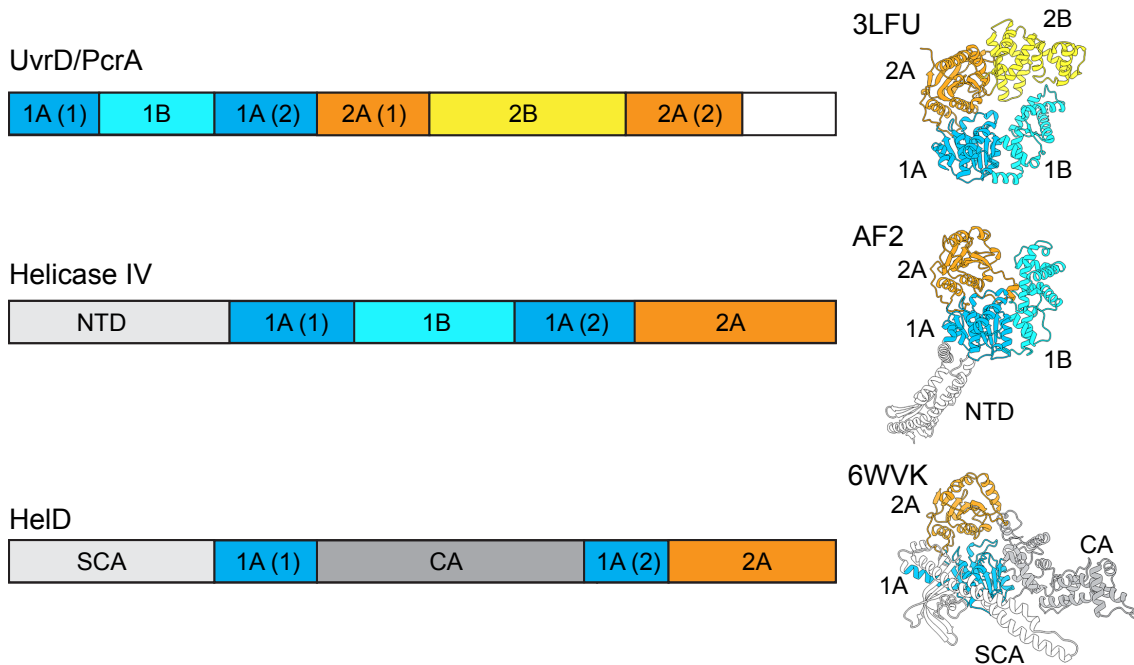

658

659 **Figure 1.** Relationship between UvrD/PcrA and helicase IV/HeID proteins. Left side shows linear  
660 representations of the domain organisation of superfamily 1 (SF1) helicase UvrD/PcrA (top),  
661 *Escherichia coli* helicase IV (middle) and *B. subtilis* HeID (bottom). Right hand side shows structures,  
662 aligned *via* their 1A and 2A domains, with domains coloured corresponding to the left panels. Top,  
663 UvrD (PDB ID 3LFU); middle, helicase IV (AlphaFold2 model, AF2); bottom, HeID (taken from  
664 RNAP-HeID complex PDB ID 6WVK). 1A, B, 2A and 2B refer to conserved SF1 helicase domains.  
665 NTD, SCA and CA refer to the AlphaFold2 modelled N-terminal domain of helicase IV and the  
666 secondary channel arm and clamp arm of HeID, respectively.

667

668

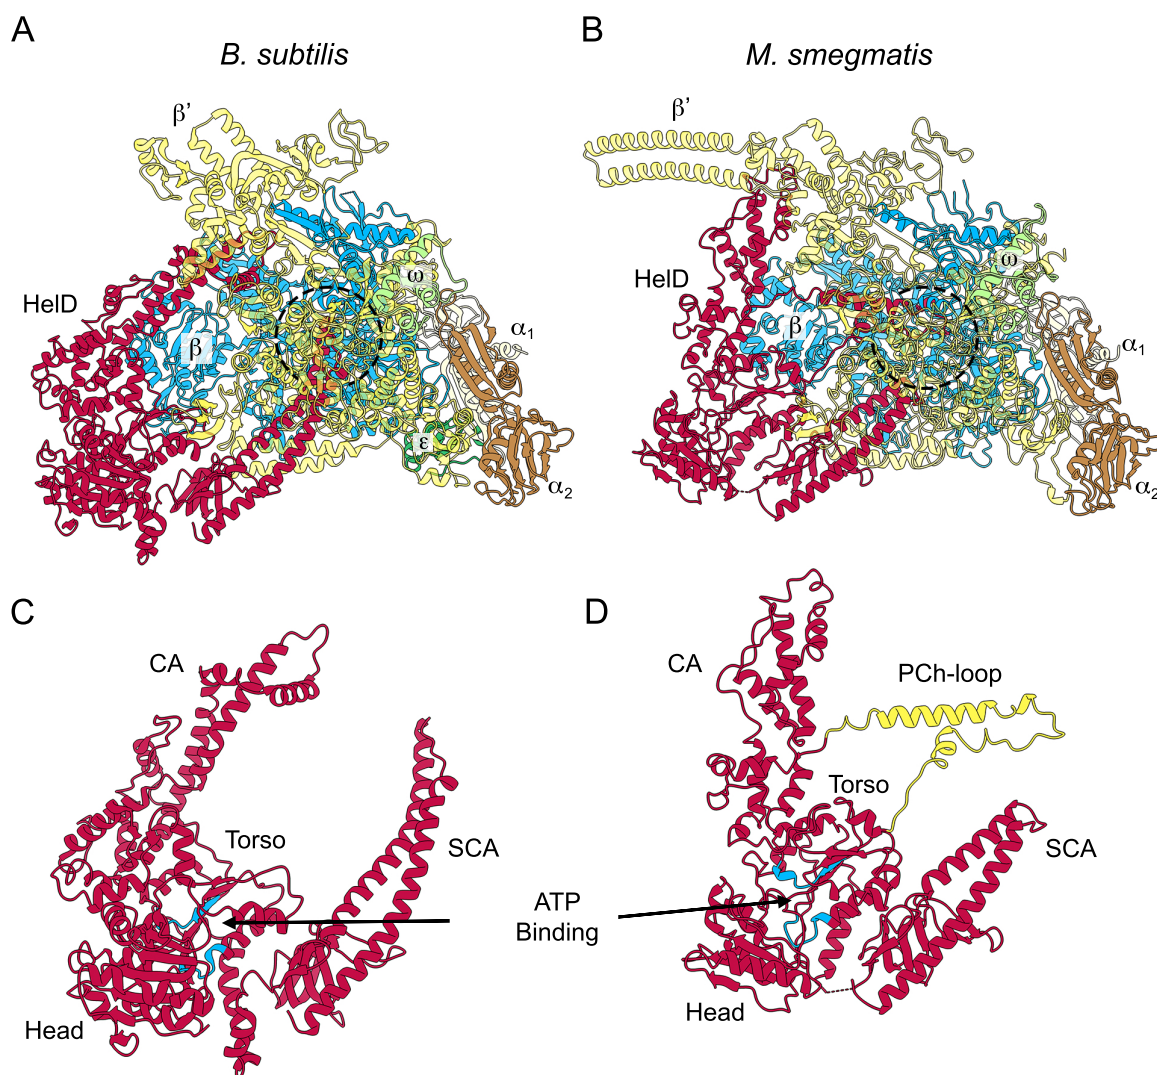

669

670 **Figure 2.** The two known structural classes of HelD. Panel A shows the structure of the *B. subtilis*  
671 RNAP-Class I HelD complex (PDB ID 6WVK). Panel B shows the *M. smegmatis* RNAP-Class II  
672 HelD complex (PDB ID 6YYS; state II). RNAP subunits and HelDs are coloured identically in both  
673 panels with the transparency of the  $\beta'$  subunit set at 50% so that HelD structures adjacent to the  
674 RNAP active site region (dashed circles) can be more easily visualised. Panels C and D show HelD  
675 structures from Panels A and B, respectively, with the ATP binding site coloured in blue and the PCh-  
676 loop from *M. smegmatis* HelD coloured in yellow (see text for details).

677

678

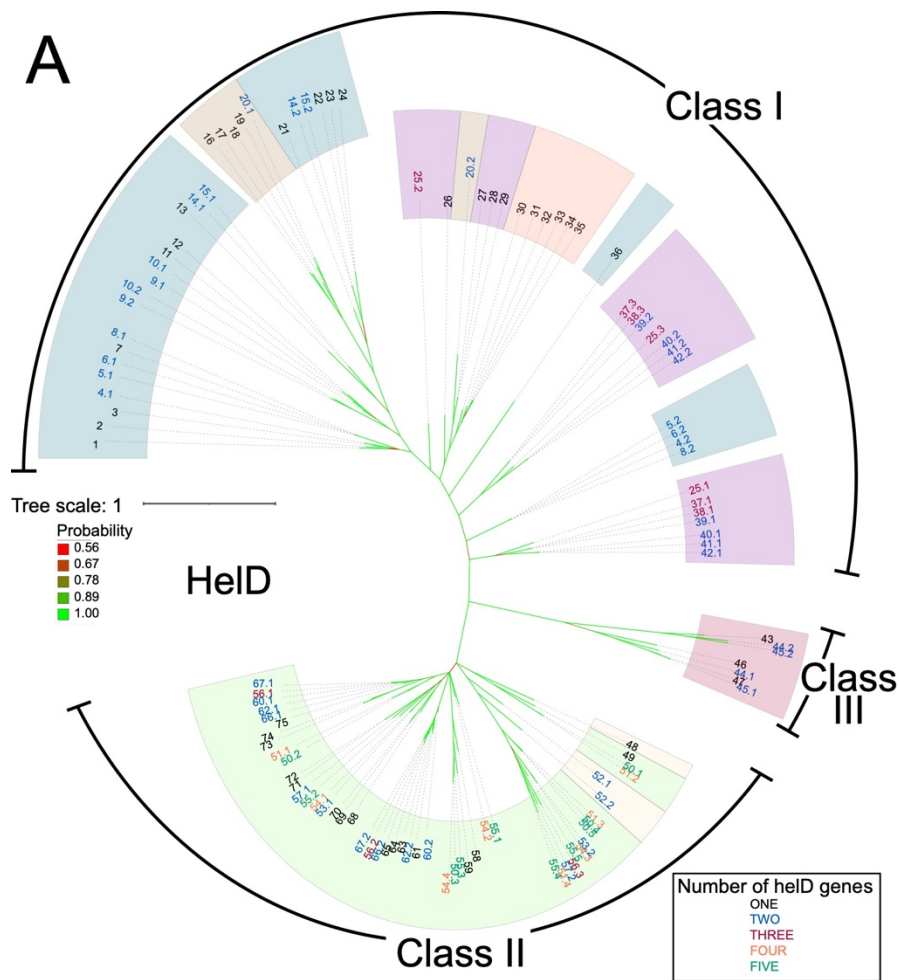

679

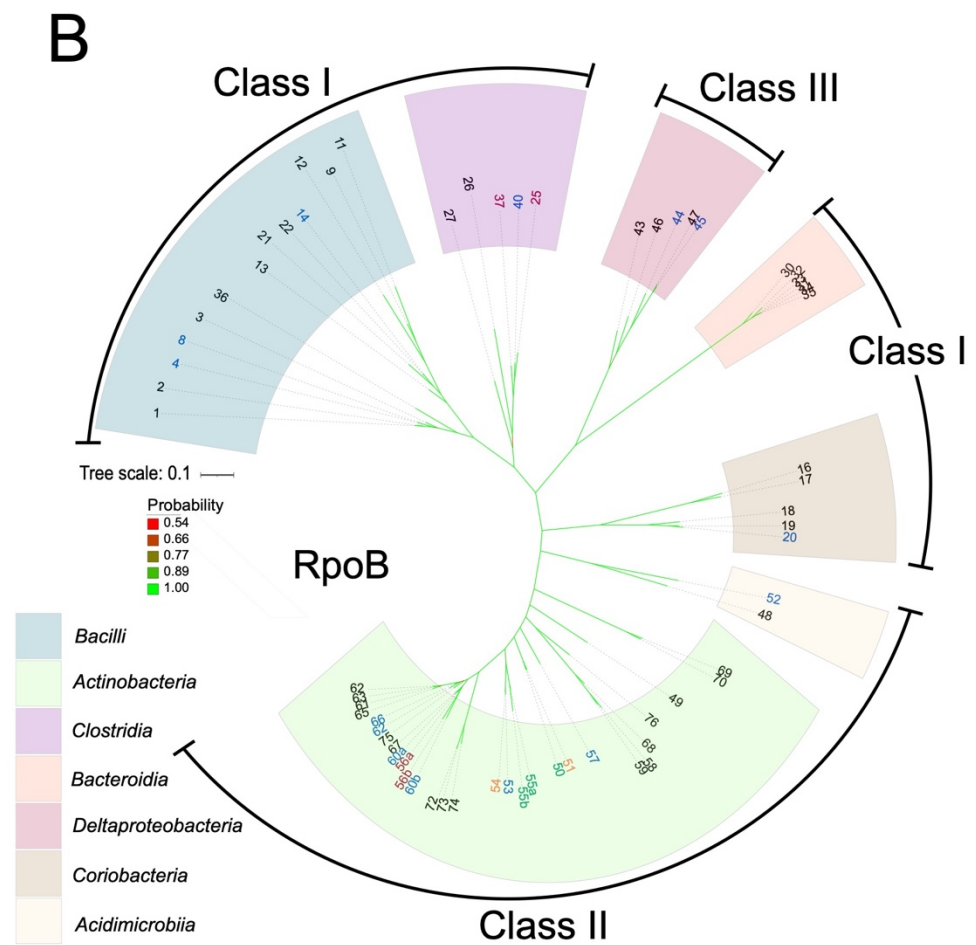

680 **Figure 3.** Unrooted phylogenetic trees of HelD (A) and RpoB (B) sequences constructed by Bayesian analysis. Tree scale representing amino acid  
681 substitutions per site, and bootstrap probability values (red least, to green most, probable) are on the left. The HelD class into which sequences fall is  
682 indicated in the outer circles as Class I, -II and -III. Coloured arcs indicate the bacterial classes into which the HelD sequences fall; teal, *Firmicutes*; pale  
683 green, *Actinobacteria*; purple, *Clostridia*; orange, *Bacteroidia*; red, *Deltaproteobacteria*; brown, *Coriobacteria*; pale yellow, *Acidimicrobia*. Individual  
684 organisms and HelD sequences are numbered (largest to smallest) and colour coded starting clockwise from *Bacillus subtilis*. Organism numbers with one  
685 HelD are numbered in black; two, blue; three, red; four, orange; five, green and are listed as follows with gene identifiers and protein length (aa) in brackets:  
686 **1** *Bacillus subtilis* 168 (BSU\_33450, 774aa). **2** *Bacillus licheniformis* ATCC 14580 (bli\_00699, 776aa). **3** *Bacillus megaterium* DSM 319 (BMD\_3869,  
687 772aa). **4** *Bacillus cereus* ATCC10987 (#1 BCE\_3516, 768 aa; #2 BCE\_2839, 689 aa). **5** *Bacillus anthracis* AMES (#1 BA\_1040, 776 aa; #2 BA\_2814, 689  
688 aa). **6** *Bacillus cereus* AH187 (#1 BCAH187\_A1206, 777 aa; #2 BCAH187\_A2861, 689 aa). **7** *Bacillus cereus* ATCC14579 (BC\_1041, 777 aa). **8** *Bacillus*  
689 *thuringiensis* Bt407 (#1 btg\_c11000, 778aa; #2 btg\_c29280, 691aa). **9** *Lactobacillus plantarum* WCFS1 (#1 lpl\_0432, 769aa; #2 lpl\_0910, 768aa). **10**  
690 *Lactobacillus rhamnosus* GG (#1 lrh\_01975, 763aa; #2 lrh\_02619, 762aa). **11** *Leuconostoc lactis* WiKim40 (llf\_04535, 788aa). **12** *Lactobacillus acidophilus*  
691 NCFM (lac\_1676, 687aa). **13** *Carnobacterium inhibens* subsp. Gilchinskyi WN1359 (caw\_09345, 800aa). **14** *Enterococcus faecium* Aus0004 (#1  
692 EFAU004\_01304, 759 aa; #2 EFAU004\_00387, 711 aa). **15** *Enterococcus faecium* DO (#1 HMPREF0351\_10989, 759 aa; #2 HMPREF0351\_10397, 711 aa).  
693 **16** *Olsenella uli* DSM 7084 (OLS\_0501, 731aa). **17** *Atopobium parvulum* DSM 20469 (Apar\_0360, 736aa). **18** *Slackia heliotrinireducens* DSM 20476:  
694 (Shel\_05840 (698aa). **19** *Eggerthella lenta* DSM 2243(Elen\_2835, 716aa). **20** *Adlercreutzia equolifaciens* DSM 19450 (#1 AEQU\_1689, 761aa; #2  
695 AEQU\_0484, 733aa). **21** *Vagococcus teuberi* (vte\_03205, 717aa). **22** *Enterococcus faecalis* V583 (EF\_0933, 732 aa). **23** *Enterococcus faecalis* DENG1  
696 (DENG\_00988, 732 aa). **24** *Enterococcus faecalis* OG1RF (OG1RF\_10660, 740 aa). **25** *Clostridium beijerinckii* NCIMB 8052 (#1 cbe\_2947, 755aa; #2  
697 cbe\_2724, 745aa; #3 cbe\_4782, 724aa). **26** *Epulopiscium* sp. N.t. morphotype B (EPU\_RS03295, 735aa). **27** *Clostridioides difficile* 630 (CD630\_04550, 704  
698 aa). **28** *Clostridioides difficile* RM20291 (CDR20291\_0396, 704 aa). **29** *Clostridioides difficile* CD196 (CD196\_0410, 704 aa). **30** *Bacteroides vulgatus*  
699 ATCC 8482 (BVU\_3010 (671aa). **31** *Bacteroides caccae* ATCC 43185 (CGC64\_00555, 683aa). **32** *Bacteroides cellulosilyticus* WH2 (BcelWH2\_01491,  
700 693aa). **33** *Bacteroides thetaiotaomicron* VPI-5482 (BT\_1890, 686aa). **34** *Bacteroides ovatus* ATCC 8483 (Bovatus\_02598 (687aa). **35** *Bacteroides*  
701 *xylanisolvens* XB1A (BXY\_17560, 687aa). **36** *Staphylococcus delphini* NCTC12225 (sdp\_01978, 681aa). **37** *Clostridium botulinum* A ATCC3502 (#1  
702 CBO\_2904, 763 aa; #3 CBO\_3341, 709 aa). **38** *Clostridium botulinum* A ATCC19377 (#1 CLB\_2867, 763 aa; #3 CLB\_3399, 709 aa). **39** *Clostridium*  
703 *botulinum* B1 Okra (#1 CLD\_1639, 763 aa; #2 CLD\_1179, 709 aa). **40** *Clostridium perfringens* 13 (#1 CPE\_1619, 763 aa; #2 CPE\_0599, 706 aa). **41**

704 *Clostridium perfringens* ATCC13124 (#1 CPF\_1872, 763 aa; #2 CPF\_0580, 706 aa). **42** *Clostridium perfringens* SM101 (#1 CPR\_1591, 763 aa; #2  
705 CPR\_0566 706 aa). **43** *Myxococcus xanthus* DK 1622 (MXAN\_5482, 706aa). **44** *Sandaracinus amyolyticus* DSM 53668 (#1 DB32\_004372, 872aa; #2  
706 DB32\_003397, 691aa). **45** *Minicystis rosea* DSM 2400 (#1 A7982\_09686, 743aa; #2 A7982\_06548, 703aa). **46** *Haliangium ochraceum* DSM 14365  
707 (Hoch\_0025, 852aa). **47** *Sorangium cellulosum* So157-2 (SCE1572\_03860, 747aa). **48** *Acidobacterium ferrooxidans* (Afer\_1829, 706aa). **49** *Cutibacterium*  
708 *acnes* KPA171202 (PPA0733, 753aa). **50** *Streptomyces venezuelae* (#1 SVEN\_2719, 779aa; #2 SVEN\_5092, 747aa; #3 SVEN\_6029, 722aa; #4 SVEN\_4127,  
709 675aa; #5 SVEN\_3939; 665aa). **51** *Streptomyces coelicolor* A3(2) (#1 SCO5439, 755 aa; #2 SCO2952, 744 aa; #3 SCO4316, 681 aa; #4 SCO4195, 680 aa).  
710 **52** *Ilumatobacter coccineus* (#1 aym\_09360, 715aa; #2 aym\_20540, 654aa). **53** *Frankia casuarinae* Ccl3 (#1 fra\_0952, 829aa; #2 fra\_2397, 727aa). **54**  
711 *Frankia alni* ACN14a (#1 fal\_1589, 939aa; #2 fal\_4723, 877aa; #3 fal\_3805; 866aa; #4 fal\_4811, 751aa). **55** *Nonomuraea* sp. ATCC55076 (#1 NOA\_23645,  
712 772 aa; #2 NOA\_16240, 762 aa; #3 NOA\_42280, 715 aa; #4 NOA\_08745, 660 aa; #5 NOA\_48960, 655 aa). **56** *Nocardia brasiliensis* O31\_020410 (#1  
713 nbr\_012985, 776aa; #2 nbr\_020410, 731aa; #3 nbr: O31\_005870, 699aa). **57** *Kineococcus radiotolerans* SRS30216 (#1 kra\_3607, 759aa; #2 kra\_0164,  
714 684aa). **58** *Microbacterium* sp. PAMC 28756 (mip\_00070, 717aa). **59** *Mirobacterium hominis* SJTG1 (mhos\_01135, 744aa). **60** *Nocardia farcinica*  
715 IFM10152 (#1 NFA\_19060, 765aa; #2 NFA\_44160, 726aa). **61** *Mycobacterium smegmatis* MC2 155 (MSMEG\_2174, 736aa). **62** *Rhodococcus* sp. 008 (#1  
716 rhod\_26990, 760aa; #2 rhod\_09075, 731aa). **63** *Mycobacterium* sp. JS623 (Myesm\_03949, 732aa). **64** *Mycolicibacterium phlei* (MPHL\_03003, 726aa). **65**  
717 *Mycobacteroides abscessus* ATCC 19977 (MAB\_3189c, 753aa). **66** *Rhodococcus equi* 103S (#1 REQ\_25070, 759aa; #2 REQ\_15310, 739aa). **67** *Nocardia*  
718 *asteroides* NCTC11293 (#1 nad\_03000, 753; #2 nad\_04408, 735aa). **68** *Leifsonia xyli* subsp. *Xyli* CTCB07 (Lxx\_20770, 787aa). **69** *Bifidobacterium longum*  
719 NCC2705 (BLO\_1314, 759aa). **70** *Bifidobacterium bifidum* PRL2010 (bbp\_0546, 759aa). **71** *Brevibacterium linens* BS258 (bly\_10570, 743aa). **72**  
720 *Brevibacterium flavum* ZL-1 (bfv\_07580, 755aa). **73** *Corynebacterium glutamicum* ATCC13031 (CG\_1555, 755aa). **74** *Corynebacterium diphtheriae*  
721 NTCC13129 (DIP\_1156, 770aa). **75** *Rhodococcus rhodochrous* NCTC10210 (rrt\_02795, 772aa). *Nonomuraea* sp. ATCC55076 (55), *Nocardia brasiliensis*  
722 O31\_020410 (56) and *Nocardia farcinica* IFM10152 (60) contain two copies of the *rpoB* gene (numbered x.a and x.b in panel B). Copy 1 is the housekeeping  
723 *rpoB* and copy 2 is a rifampicin-resistant *rpoB* expressed during antibiotic production in those organisms.

724

725

726

727

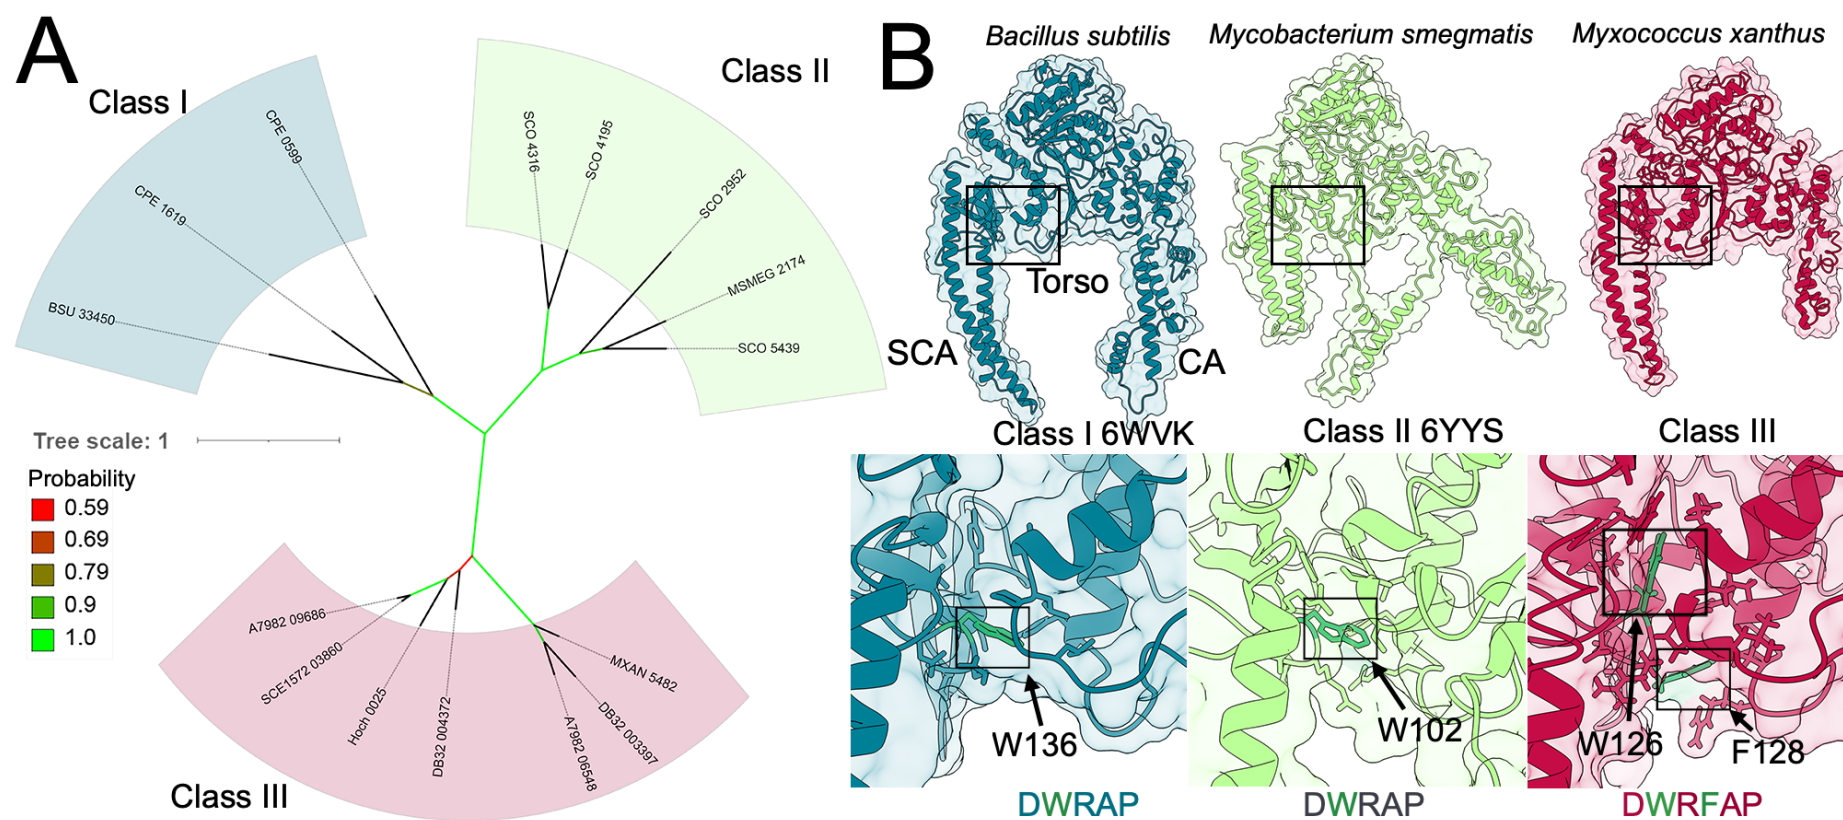

728

729 **Figure 4.** Three classes of HeID. Panel A shows a focused unrooted phylogenetic tree constructed using HeID sequences, with numbers (#) as used in Figure  
 730 1A: *B. subtilis* 168, BSU [#1]; *C. perfringens* 13, CPE [#40]; *S. coelicolor* A3(2), SCO [#51]; *M. smegmatis* MC2 155, MSMEG [#61], and  
 731 *Deltaproteobacterial* sequences from *M. xanthus* DK 1622, MXAN [#43]; *S. amylolyticus* DSM 53668, DB32 [#44]; *M. rosea* DSM 2400, A7982 [#45]; *H.*



732 *ochraceum* DSM 14365, Hoch [#46]; *S. cellulorum* So157-2, SCE1572 [#47]. Tree scale representing amino acid substitutions per site, and bootstrap values  
733 are shown on the left. Colouring of bacterial classes is the same as in Figure 1. Panel B shows structures (ribbons and transparent surface representations) of  
734 whole HelD (top) and Trp-cage regions (bottom) of Class I (*B. subtilis* PDB ID 6WVK), Class II (*M. smegmatis* PDB ID 6YYS) and Class III (*M. xanthus*,  
735 homology model) using the same colour scheme for bacterial classes as in Figures 1 and 2A. Conserved Trp (all classes) and additional amino acid (Class III)  
736 are shown as green sticks, with other amino acids that form the cage shown in the appropriate colour for their class.

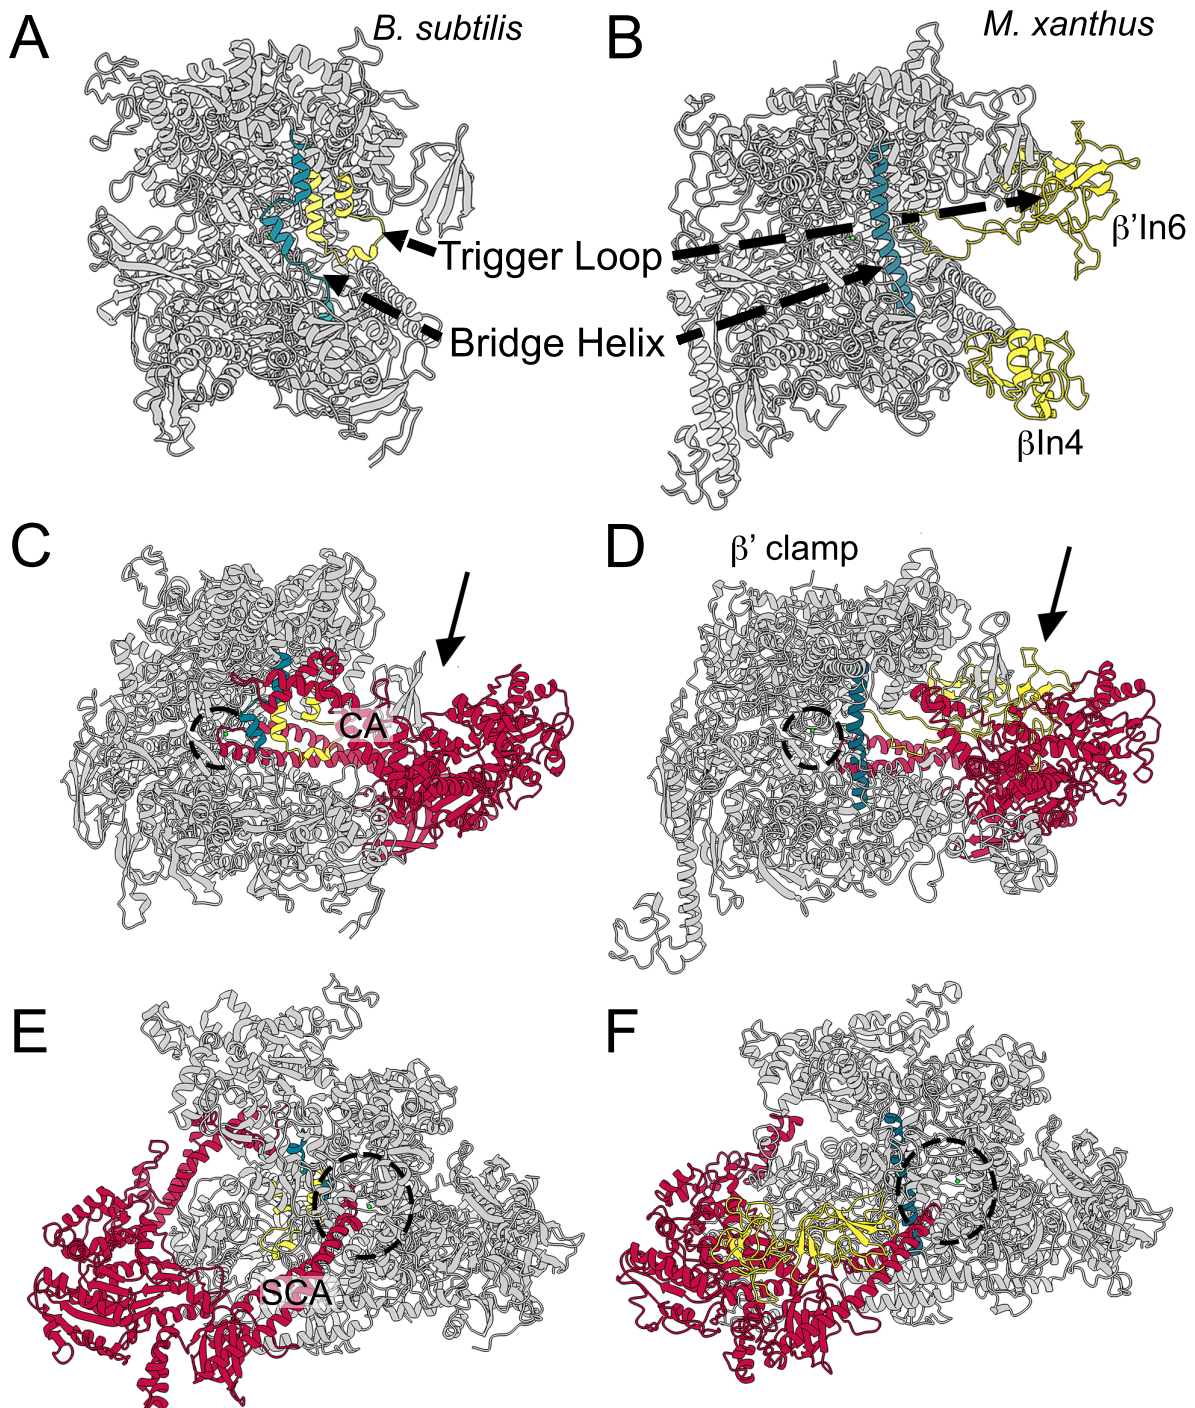

737

738 **Figure 5.** Comparison of *B. subtilis* RNAP–HelD complex with the *M. xanthus* model. Panels A and  
739 B show structures of *B. subtilis* (PDB ID 6WVK) and *M. xanthus* (model) RNAPs in complex with  
740 HelD, respectively, in which HelD has been removed to more clearly visualise elements referred to in  
741 the text. The trigger loop (yellow) and bridge helix (teal) are indicated along with the lineage specific  
742  $\beta'$ In4 (also yellow) and  $\beta'$ In6 inserts in the *M. xanthus* model. Panels C and E show the *B. subtilis*  
743 RNAP–HelD complex, PDB ID 6WVK. Panels D and F show *M. xanthus* RNAP–HelD model.  
744 RNAP is shown in grey in all panels, HelD in red, bridge helix in teal and trigger loop in yellow (see

745 text for further details). The active site  $Mg^{2+}$  is shown as a small green sphere (within the dotted  
746 circles). The arrows in panels C and E denote the view of the respective RNAP–HelD complex in  
747 panels E and F. The view in panels C and D is into the primary channel to which the clamp arm (CA)  
748 of HelD binds. The view in panels E and F is into the secondary channel (dotted circle) into which the  
749 secondary channel arm (SCA) is inserted.

750

751

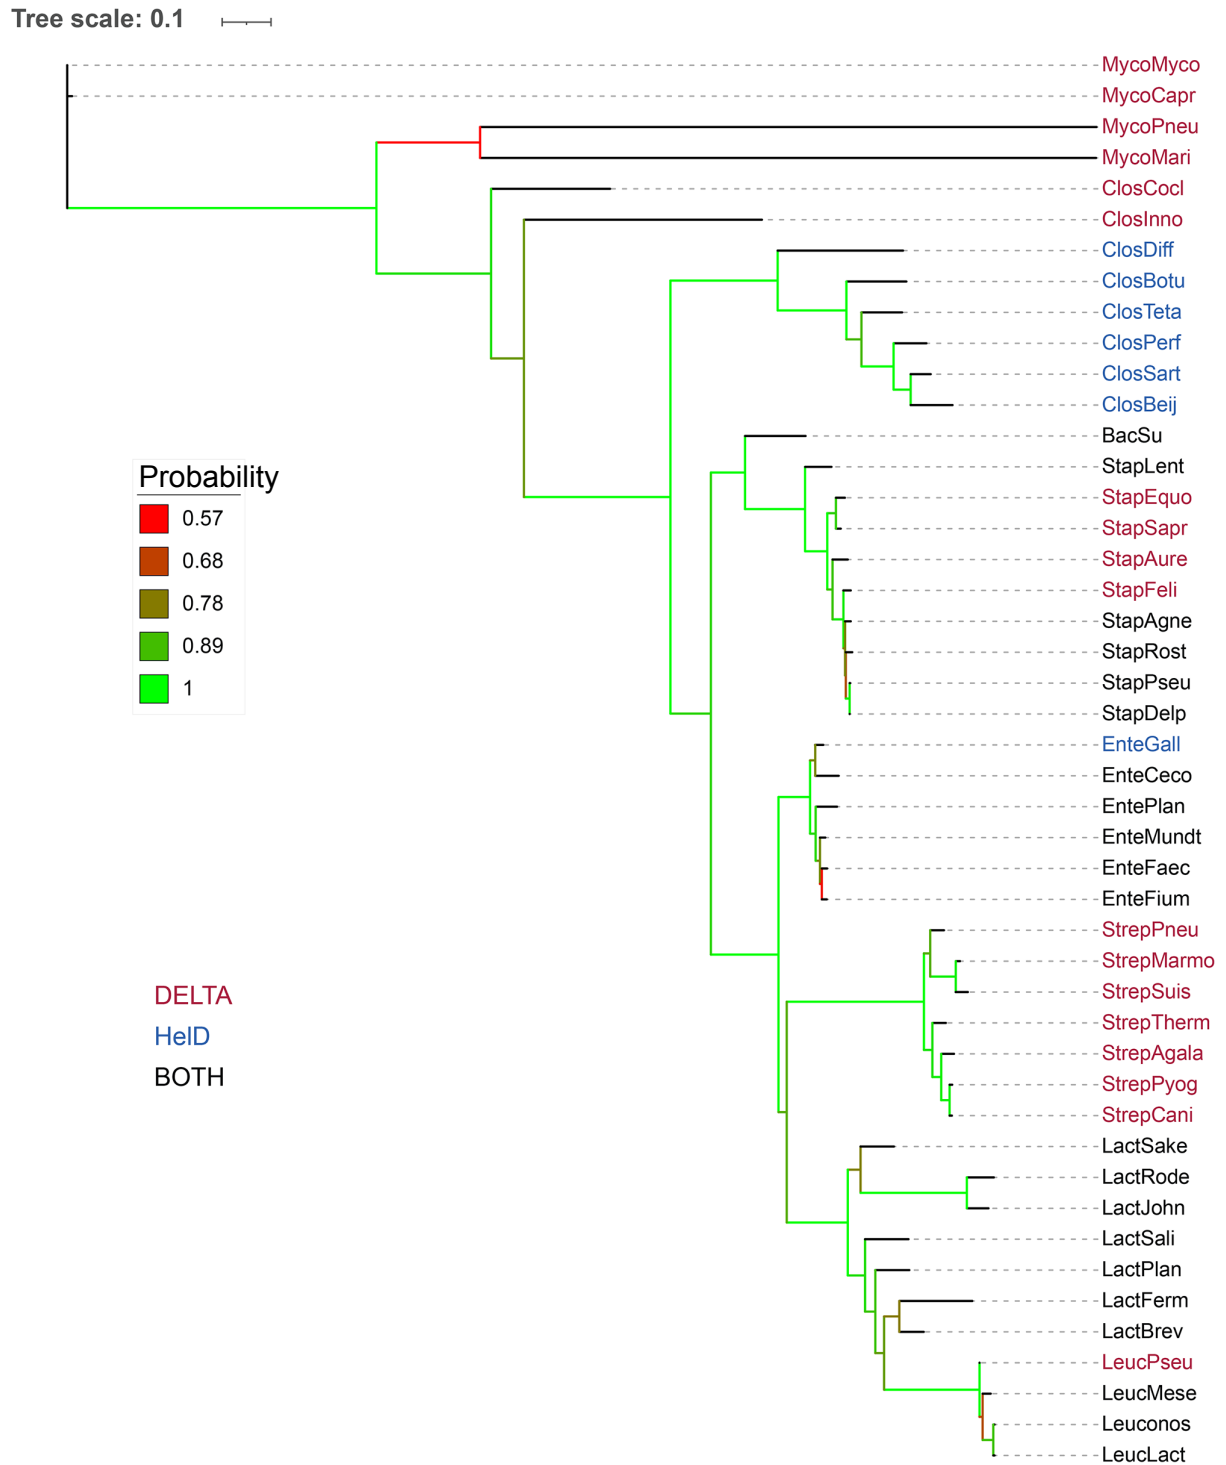

752

753 **Figure 6.** Phylogenetic tree of RpoB with respect to distribution of HeID and the  $\delta$  subunit of RNAP.

754 Tree scale and bootstrap values are shown on the left. Organisms that contain the  $\delta$  subunit (DELTA)

755 are shown in red, just HeID (blue) and both  $\delta$  and HeID (black). *Mycoplasma mycoides* (MycoMyco),

756 *Mycoplasma capricolum* (MycoCapr), *Mycoplasma pneumoniae* (MycoPneu), *Mycoplasma marinum*

757 (*MycoMari*), *Erysipelatoclostridium cocleatum* (ClosCocl), *Erysipelatoclostridium innocuum*

758 (*ClosInno*), *Clostridioides difficile* (ClosDiff), *Clostridium botulinum* (ClosBotu), *Clostridium*

759 *perfringens* (ClosPerf), *Clostridium sartagoforme* (ClosSart), *Clostridium beijernickii* (ClosBeij),

760 *Bacillus subtilis* (BacSu), *Staphylococcus lentus* (StapLent), *Staphylococcus equorum* (StaphEquo)  
761 *Staphylococcus saprophyticus* (StapSapr), *Staphylococcus aureus* (StapAure), *Staphylococcus felis*  
762 (StapFeli), *Staphylococcus agnetis* (StapAgne), *Staphylococcus rostri* (Staprost), *Staphylococcus*  
763 *pseudointermidius* (StapPseu), *Staphylococcus delphini* (StapDelp), *Enterococcus gallinarum*  
764 (EnteGall), *Enterococcus cecorum* (EnteCeco), *Enterococcus plantarum* (EntePlan), *Enterococcus*  
765 *mundti* (EnteMundt), *Enterococcus faecalis* (EnteFaec), *Enterococcus faecium* (EnteFium),  
766 *Streptococcus pneumoniae* (StrepPneu), *Streptococcus marmotae* (StrepMarmo), *Streptococcus suis*  
767 (StrepSuis), *Streptococcus thermophilus* (StrepTherm), *Streptococcus agalactiae* (StrepAgala),  
768 *Streptococcus pyogenes* (StrepPyog), *Streptococcus canis* (StrepCani), *Lactobacillus sakei*  
769 (LactSake), *Lactococcus rodentium* (LactRode), *Lactobacillus johnsonii* (LactJohn), *Lactobacillus*  
770 *salivarius* (LactSali), *Lactobacillus plantarum* (LactPlan), *Lactobacillus fermentum* (LactFerm),  
771 *Lactobacillus brevis* (LactBrev), *Leuconostoc pseudomesenteroides* (LeucPseu), *Leuconostoc*  
772 *mesenteroides* (LeucMese), *Leuconostoc sp.* (Leuconos), and *Leuconostoc lactis* (LeucLact).

773

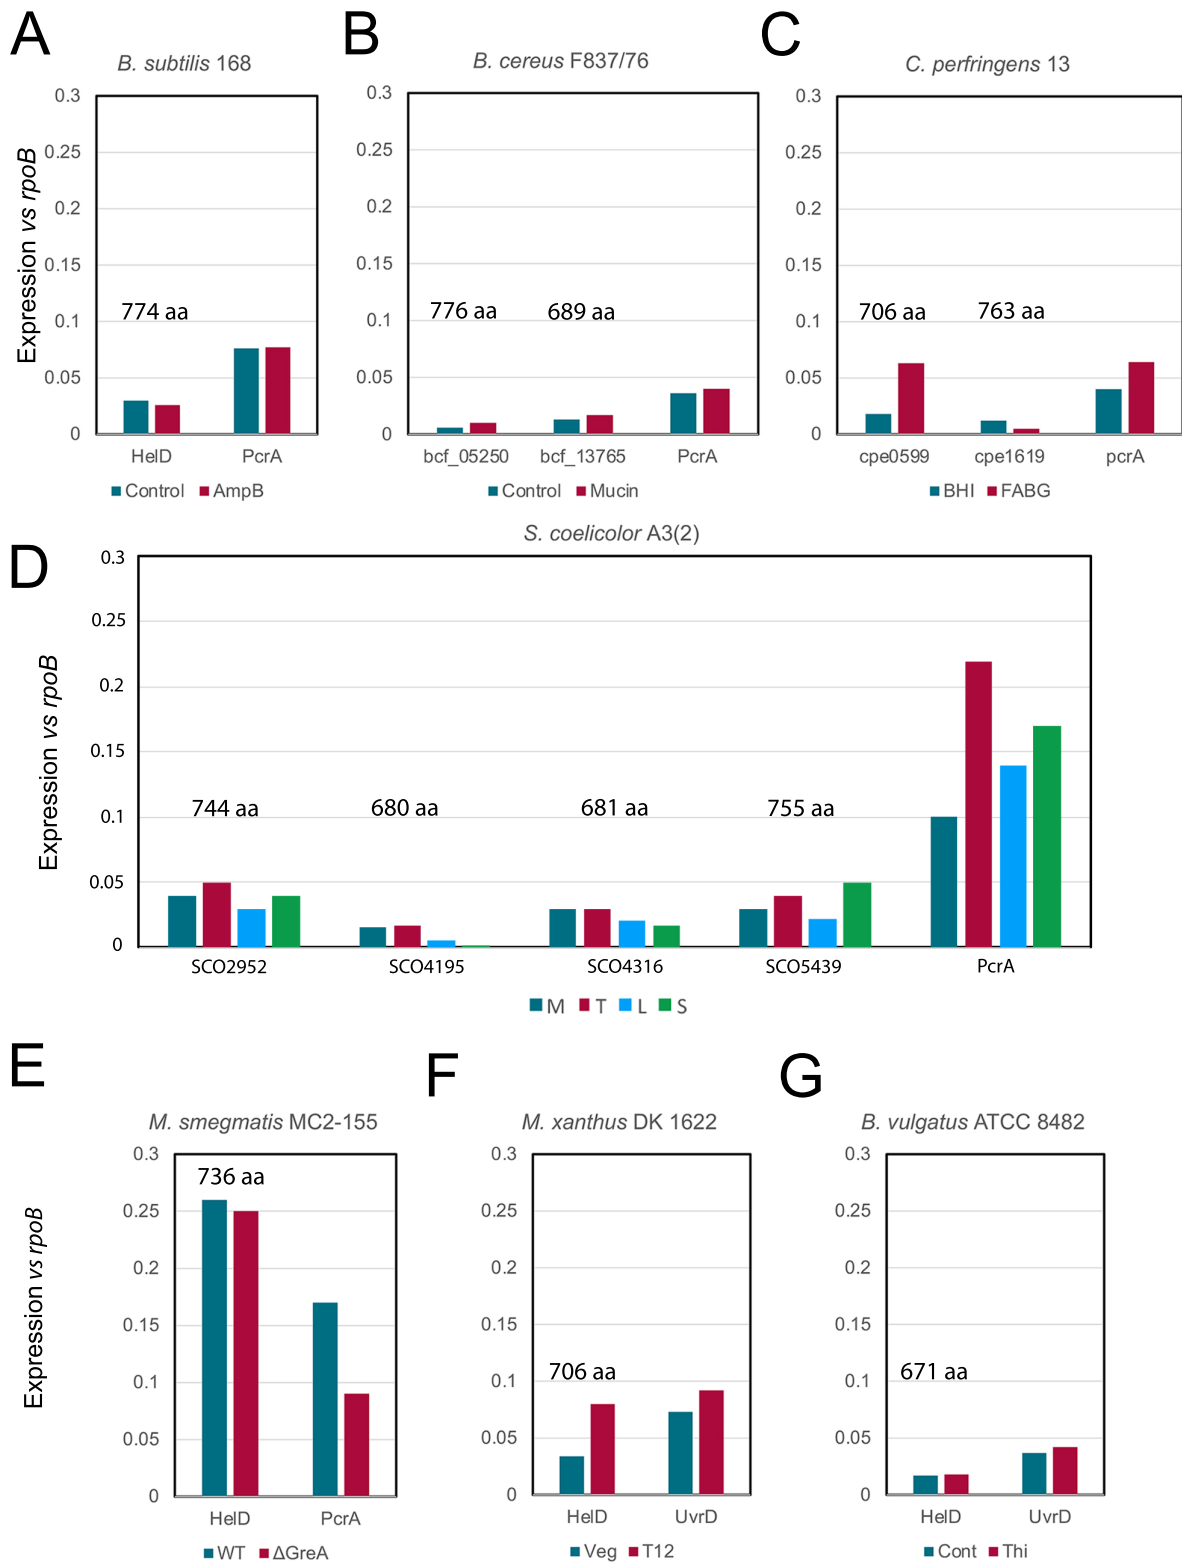

774

775 **Figure 7.** Expression levels of HelD. The relative transcript levels of *helD* and *pcrA/uvrD* compared  
776 to *rpoB* are shown in panels A–G. Organism names are shown on the top of each plot and gene  
777 expression levels are colour coded according to the keys below the plots. The sizes of the HelD  
778 isoforms in amino acids are indicated above the corresponding column in each panel. Details of the

779 sources of the data sets used are provided in the text. *A. B. subtilis* 168 data; control teal,  
780 amphotericin B (AmpB) treatment red. *B. B. cereus* F837/76 data; control teal, mucin treatment red.  
781 *C. C. perfringens* 13 data; growth in brain heart infusion (BHI) teal, fastidious anaerobic broth +  
782 glucose (FABG) red. *D. S. coelicolor* A3(2) data; mid-exponential growth (M) teal, transition phase  
783 (T) red, late exponential (L) blue, stationary phase (S) green. *E. M. smegmatis* MC2-155 data; control  
784 teal, *greA* deletion strain ( $\Delta$ GreA) red. *F. M. xanthus* DK1622 data; vegetative growth teal, 12 hours  
785 after initiation of sporulation (T12) red. *G. B. vulgatus* ATCC 8482 data; control teal, supplemented  
786 with thiamine (Thi) red.
